# Supplementary material for: α/β-Peptides as Nanomolar Triggers of Lipid Raft-Mediated Endocytosis through GM1 Ganglioside Recognition
Source: MDPI journal article supplement (doi:10.3390/pharmaceutics14030580), 2022-03-07

## Supporting Information

# $\alpha/\beta$ -Peptides as nanomolar triggers of lipid raft-mediated endocytosis through GM1 ganglioside recognition

Anasztázia Hetényi <sup>1,5</sup>, Enikő Szabó <sup>2,5</sup>, Norbert Imre <sup>1</sup>, Kaushik Nath Bhaumik <sup>1</sup>, Attila Tököli <sup>1</sup>, Tamás Füzesi <sup>1</sup>, Réka Hollandi <sup>3</sup>, Peter Horvath <sup>3</sup>, Ágnes Czibula <sup>2,\*</sup>, Éva Monostori <sup>2</sup>, Mária A. Deli <sup>4</sup> and Tamás A. Martinek <sup>1,\*</sup>

- <sup>1</sup> Department of Medical Chemistry, University of Szeged, Dóm tér 8., 6720 Szeged, Hungary
- <sup>2</sup> Institute of Genetics, Biological Research Centre, Temesvári krt. 62., 6726 Szeged, Hungary
- <sup>3</sup> Institute of Biophysics, Biological Research Centre, Temesvári krt. 62., 6726 Szeged, Hungary
- <sup>4</sup> Synthetic and Systems Biology Unit, Biological Research Centre, Temesvári krt. 62., 6726 Szeged, Hungary
- <sup>5</sup> These authors contributed equally to this work
- \* Correspondence: martinek.tamas@med.u-szeged.hu, czibula.agnes@brc.hu

### Table of contents

|                                                                                        |    |
|----------------------------------------------------------------------------------------|----|
| <b>Figure S1.</b> ITC detection of interactions of GM1 with <i>A/a</i> -derivatives.   | S2 |
| <b>Figure S2.</b> ITC detection of interactions of GM1 with <i>d</i> -derivatives      | S2 |
| <b>Figure S3.</b> ITC detection of interactions of GM1 with $\beta$ -derivatives       | S2 |
| <b>Figure S4.</b> CD spectrum of peptides                                              | S3 |
| <b>Figure S5.</b> ITC detection of interactions of GM1 with carrier-NA conjugates      | S3 |
| <b>Figure S6.</b> ITC enthalpograms of WYKYW-GM1 interaction with pure GM1 and GM1:DPC | S3 |
| <b>Table S1.</b> Half-lives of compounds in protease assay with chymotrypsin           | S4 |
| <b>Table S2.</b> Statistical Analysis                                                  | S4 |
| Peptide characterization data                                                          | S5 |

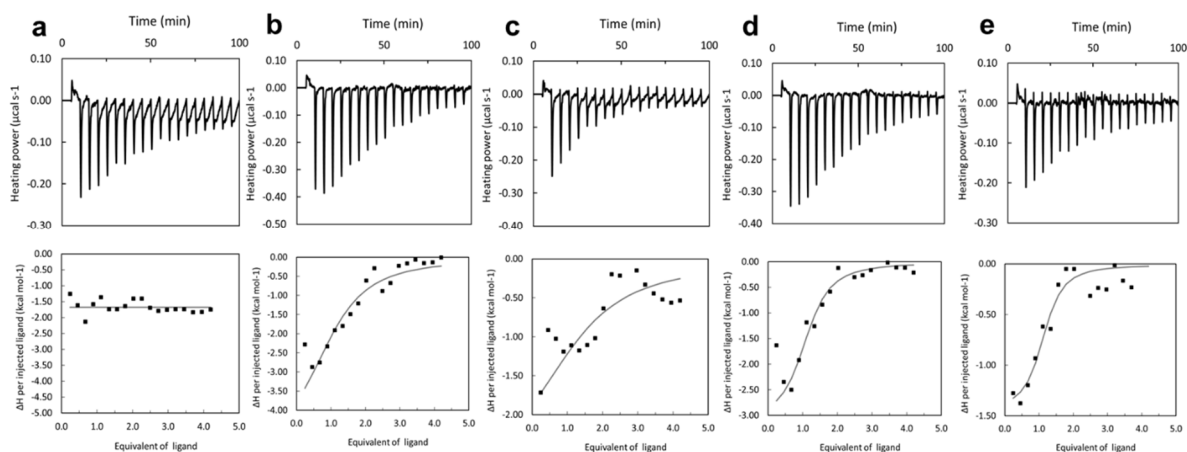

**Figure S1.** ITC detection of interactions of GM1 with *A/a* derivatives (a) AYKYW, (b) WAKYW, (c) WYAYW, (d) WYKAW and (e) WYKYA. Titrations were carried out with GM1:DPC 1:5 bicelles.

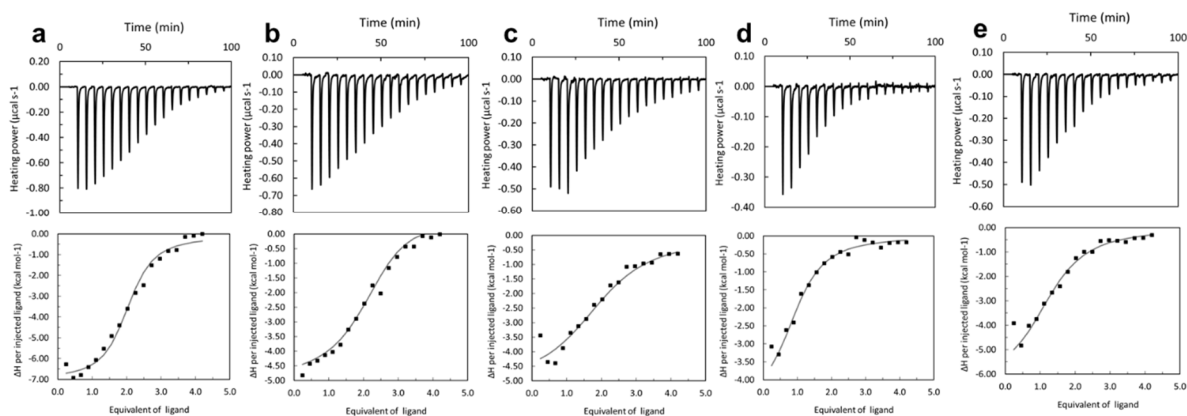

**Figure S2.** ITC detection of interactions of GM1 with *d* derivatives (a) wYKYW, (b) WyKYW, (c) WYKYW, (d) WYKYw and (e) WYKYw. Titrations were carried out with GM1:DPC 1:5 bicelles.

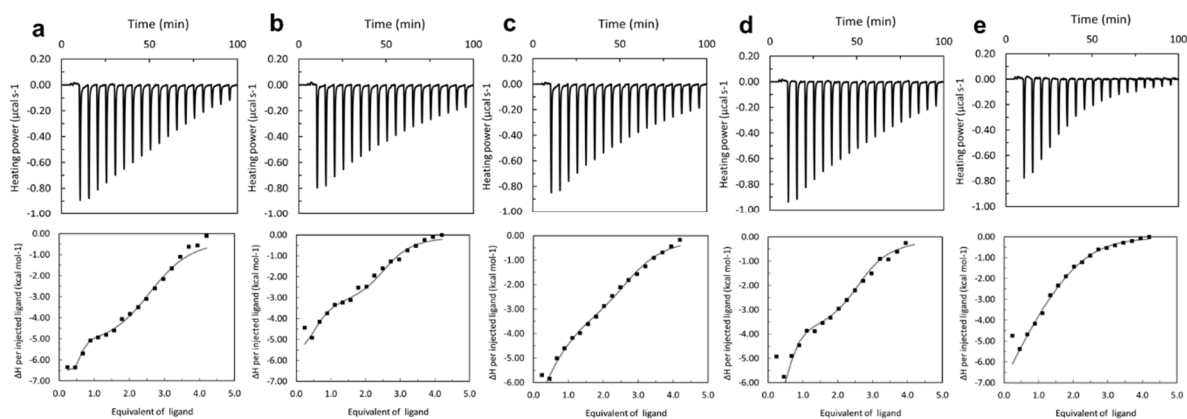

**Figure S3.** ITC detection of interactions of GM1 with  $\beta$ -derivatives (a) W $\beta$ YKYW, (b) WY $\beta$ KYW, (c) WYK $\beta$ YW, (d) WYKY $\beta$ W and (e) WYKYW $\beta$ . Titrations were carried out with GM1:DPC 1:5 bicelles.

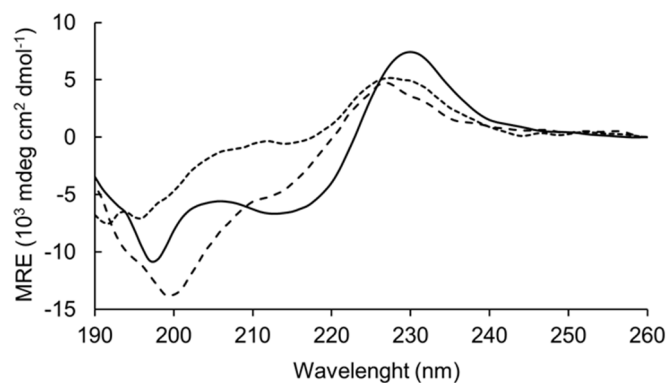

**Figure S4.** CD spectrum of peptides WYKYW (black), WAKAW (long dashed), and AYKYA (short dashed) (200  $\mu$ M) at 303 K.

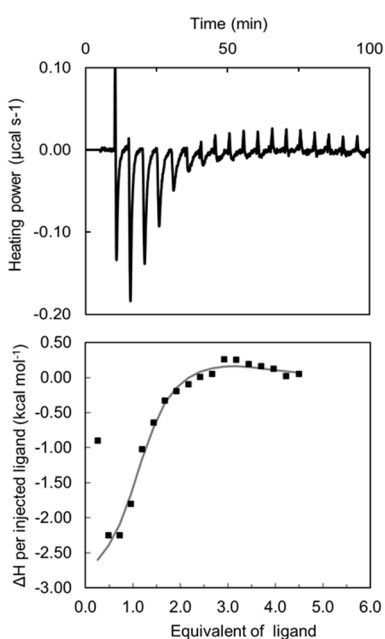

**Figure S5.** ITC detection of interactions of GM1 with carrier-NA conjugates. Enthalpograms of NA(biotinyl-Penetratin-WYK $^{\beta}$ YW)<sub>4</sub> ( $n=1$ ,  $K_D=79$  nM). Titrations were carried out with GM1:DPC 1:5 bicelles.

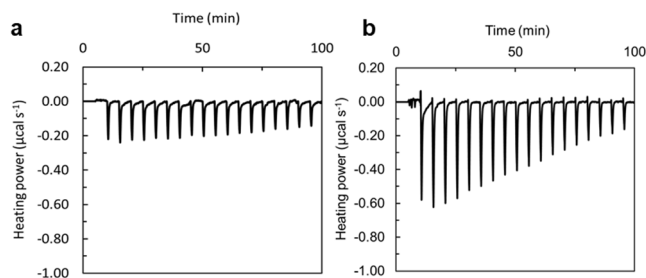

**Figure S6.** ITC enthalpogram obtained for WYKYW with pure GM1 micelles (a) and with GM1:DPC 1:5 bicelles (b).

**Table S1.** Half-lives of compounds in protease assay with chymotrypsin. In most cases, the peak belonging to the sequence was not detected at the first sampling (2 minutes), hence the half-life is < 24s with a 3% detection limit. \* No degradation was detected during the experiment.

| Sequence            | Half-life (s) |          |
|---------------------|---------------|----------|
|                     | Chymotrypsin  | Trypsin  |
| WYKYW               | < 24          | < 24     |
| W <sup>β</sup> YKYW | < 24          | 110      |
| WY <sup>β</sup> KYW | 75            | 900      |
| WYK <sup>β</sup> YW | 650           | >> 24 h* |
| WYKY <sup>β</sup> W | < 24          | 410      |
| WYKYW <sup>β</sup>  | < 24          | < 24     |

*Statistical Analysis:* Statistical analysis included one-way analysis of variance (ANOVA) with post hoc Tukey honestly significant difference test (\* $p < 0.1$ ; \*\* $p < 0.01$ ; \*\*\* $p < 0.001$ ; \*\*\*\* $p < 0.0001$ ). The results of the statistical test are included in Table S2.

**Table S2**

| 1 hour                                      | Summary | Adjusted P Value |
|---------------------------------------------|---------|------------------|
| WYKYW vs. W <sup>β</sup> YKYW               | ****    | <0,0001          |
| WYKYW vs. WY <sup>β</sup> KYW               | ****    | <0,0001          |
| WYKYW vs. WYK <sup>β</sup> YW               | *       | 0,0448           |
| WYKYW vs. WYKY <sup>β</sup> W               | ****    | <0,0001          |
| WYKYW vs. WYKYW <sup>β</sup>                | **      | 0,0099           |
| W <sup>β</sup> YKYW vs. WY <sup>β</sup> KYW | ns      | 0,1567           |
| W <sup>β</sup> YKYW vs. WYK <sup>β</sup> YW | ***     | 0,0001           |
| W <sup>β</sup> YKYW vs. WYKY <sup>β</sup> W | ns      | >0,9999          |
| W <sup>β</sup> YKYW vs. WYKYW <sup>β</sup>  | ***     | 0,0008           |
| WY <sup>β</sup> KYW vs. WYK <sup>β</sup> YW | ns      | 0,5618           |
| WY <sup>β</sup> KYW vs. WYKY <sup>β</sup> W | *       | 0,0141           |
| WY <sup>β</sup> KYW vs. WYKYW <sup>β</sup>  | ns      | 0,8793           |
| WYK <sup>β</sup> YW vs. WYKY <sup>β</sup> W | ****    | <0,0001          |
| WYK <sup>β</sup> YW vs. WYKYW <sup>β</sup>  | ns      | >0,9999          |
| WYKY <sup>β</sup> W vs. WYKYW <sup>β</sup>  | ****    | <0,0001          |

| 4 hours                                     | Summary | Adjusted P Value |
|---------------------------------------------|---------|------------------|
| WYKYW vs. W <sup>β</sup> YKYW               | ****    | <0,0001          |
| WYKYW vs. WY <sup>β</sup> KYW               | ns      | 0,1364           |
| WYKYW vs. WYK <sup>β</sup> YW               | ****    | <0,0001          |
| WYKYW vs. WYKY <sup>β</sup> W               | ****    | <0,0001          |
| WYKYW vs. WYKYW <sup>β</sup>                | ****    | <0,0001          |
| W <sup>β</sup> YKYW vs. WY <sup>β</sup> KYW | ****    | <0,0001          |
| W <sup>β</sup> YKYW vs. WYK <sup>β</sup> YW | ns      | 0,0734           |
| W <sup>β</sup> YKYW vs. WYKY <sup>β</sup> W | ns      | >0,9999          |
| W <sup>β</sup> YKYW vs. WYKYW <sup>β</sup>  | **      | 0,0082           |
| WY <sup>β</sup> KYW vs. WYK <sup>β</sup> YW | ns      | 0,1742           |
| WY <sup>β</sup> KYW vs. WYKY <sup>β</sup> W | ****    | <0,0001          |
| WY <sup>β</sup> KYW vs. WYKYW <sup>β</sup>  | ****    | <0,0001          |
| WYK <sup>β</sup> YW vs. WYKY <sup>β</sup> W | *       | 0,0248           |
| WYK <sup>β</sup> YW vs. WYKYW <sup>β</sup>  | ****    | <0,0001          |
| WYKY <sup>β</sup> W vs. WYKYW <sup>β</sup>  | ns      | 0,0891           |

## Peptide characterization data

HPLC chromatograms and MS spectra for each sequence are shown below.

### WYKYW (WYKYW-NH<sub>2</sub>)

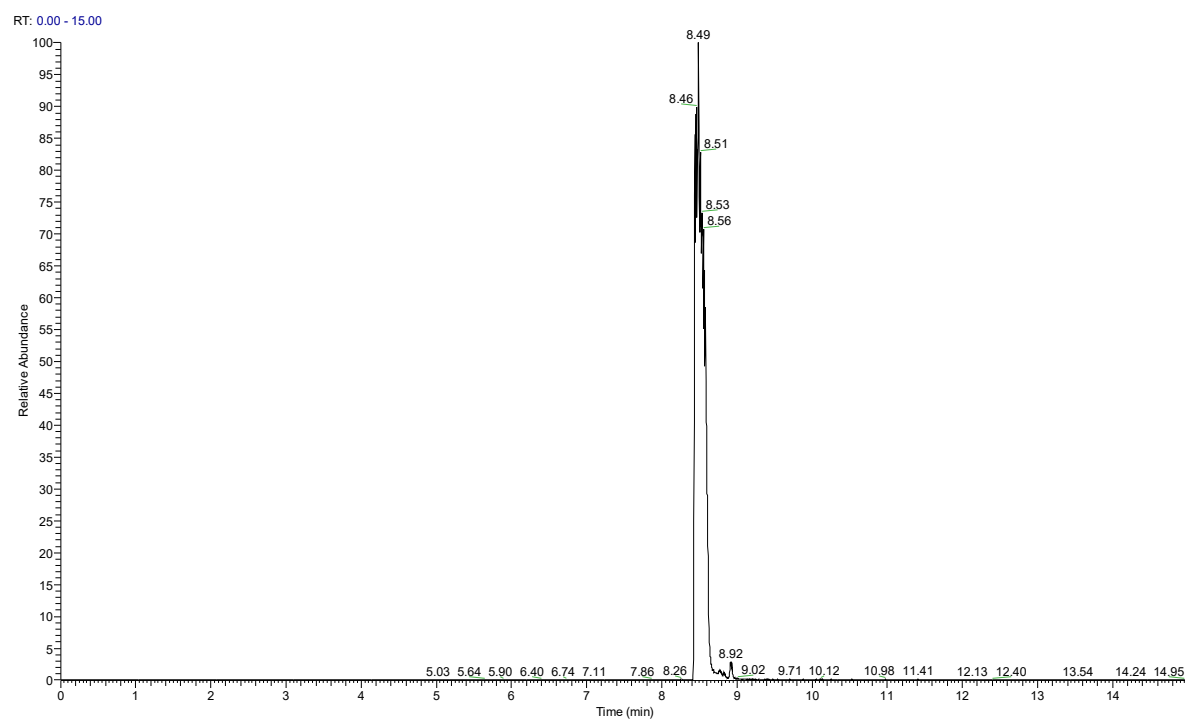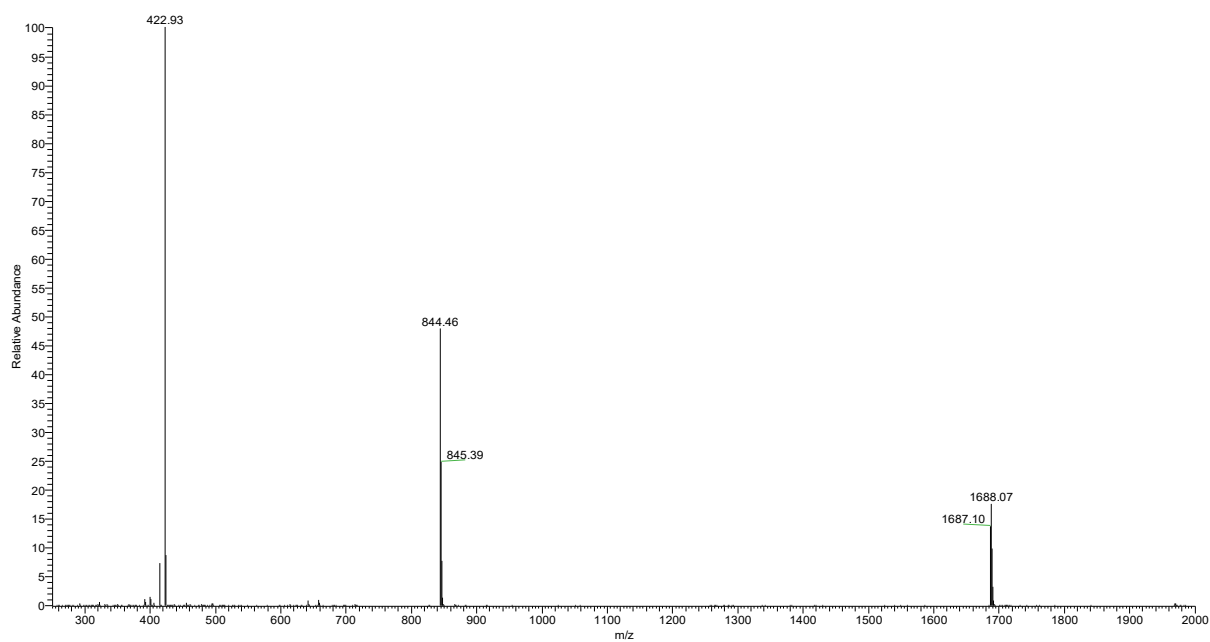

W $\beta$ YKYW

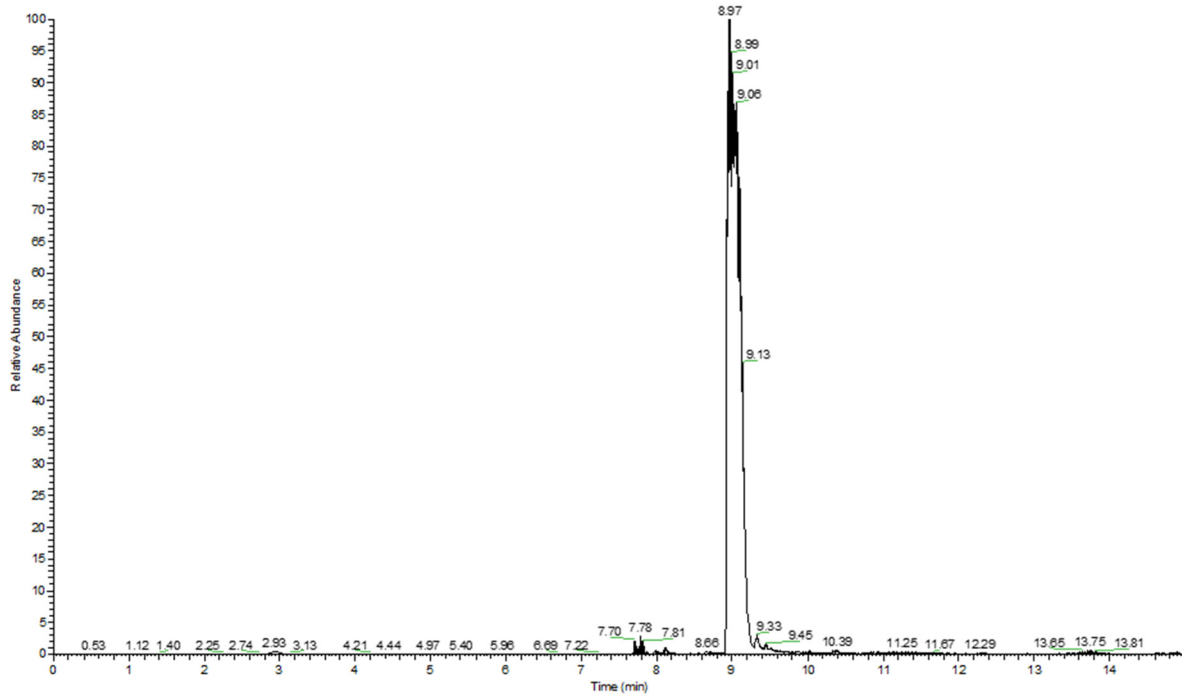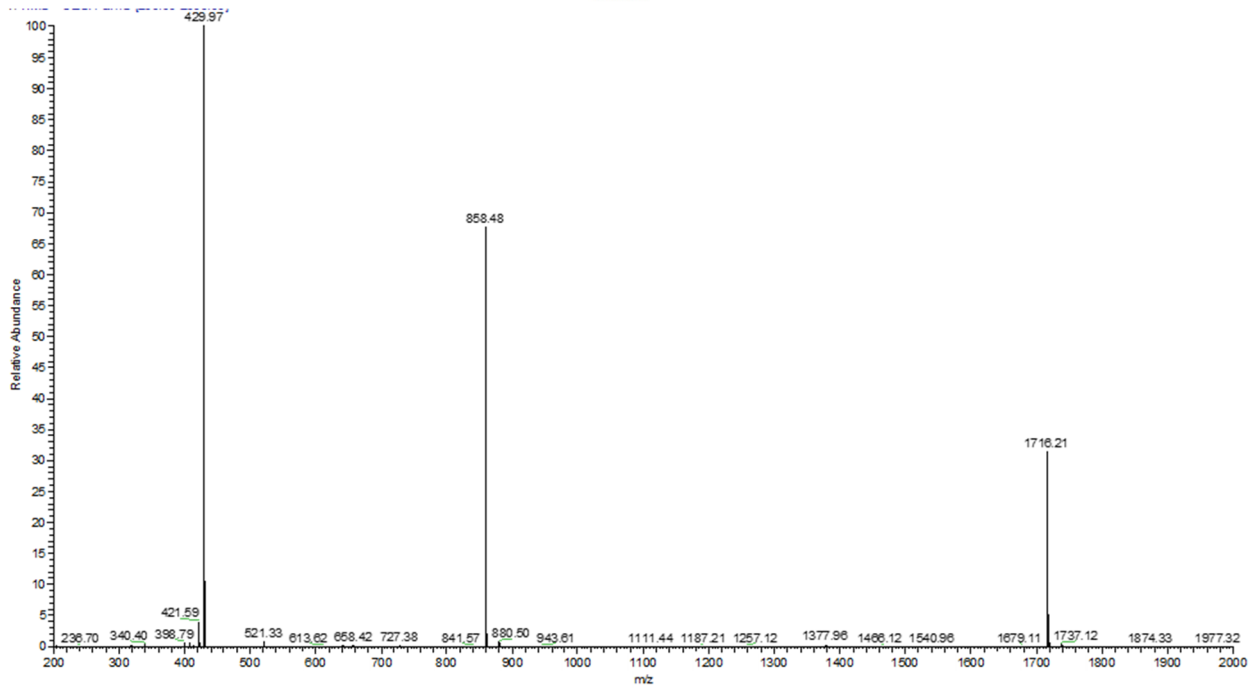

WY<sup>β</sup>KYW

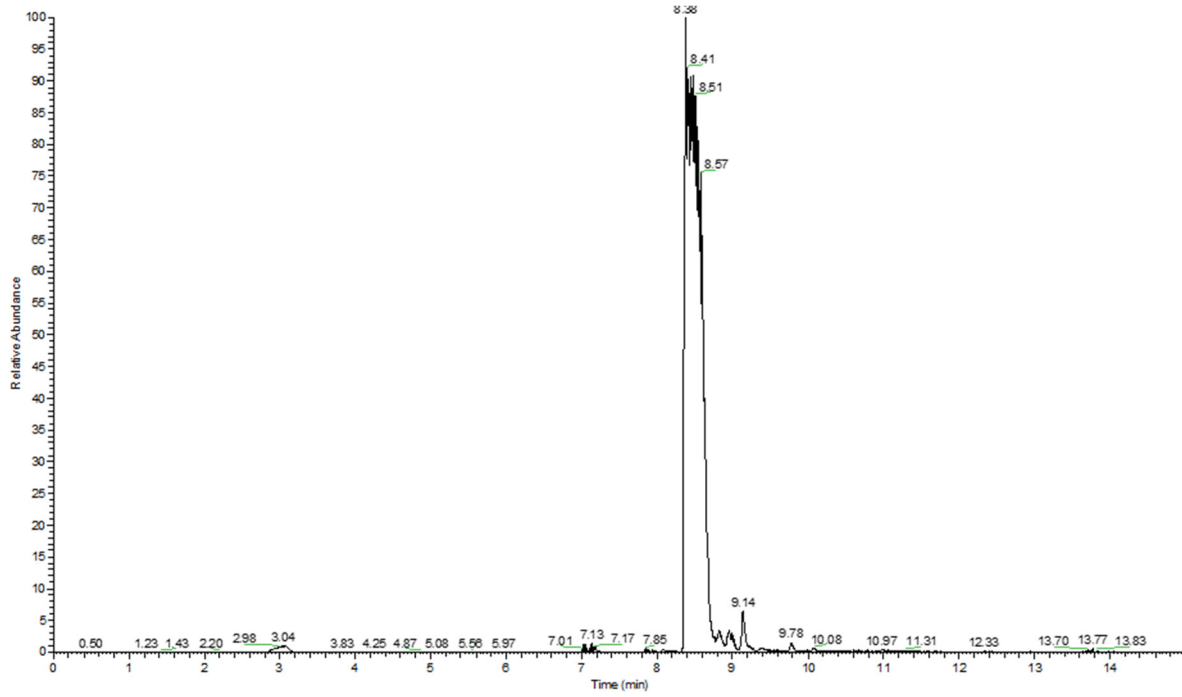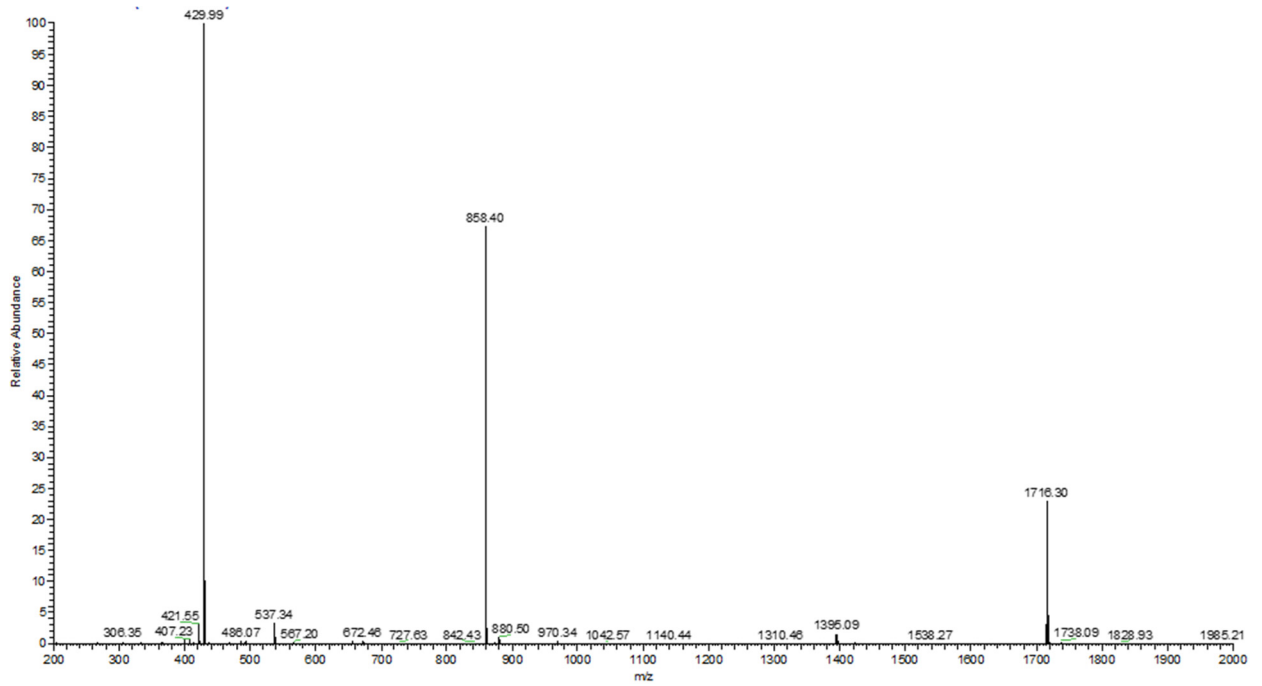

WYK $\beta$ YW

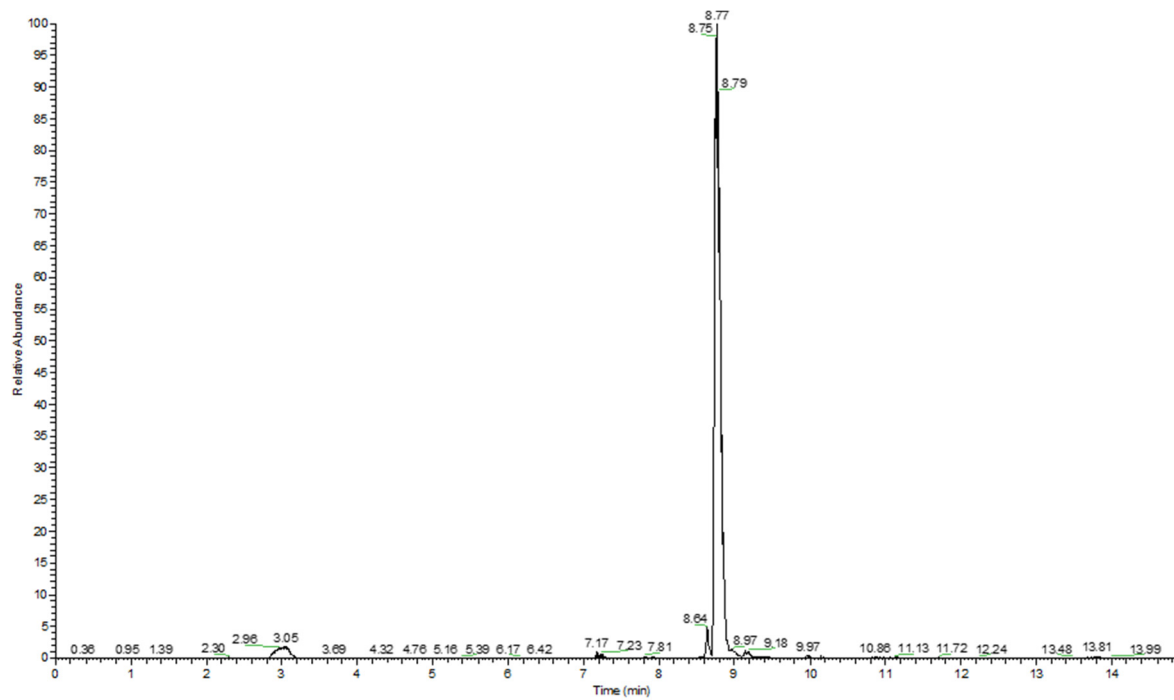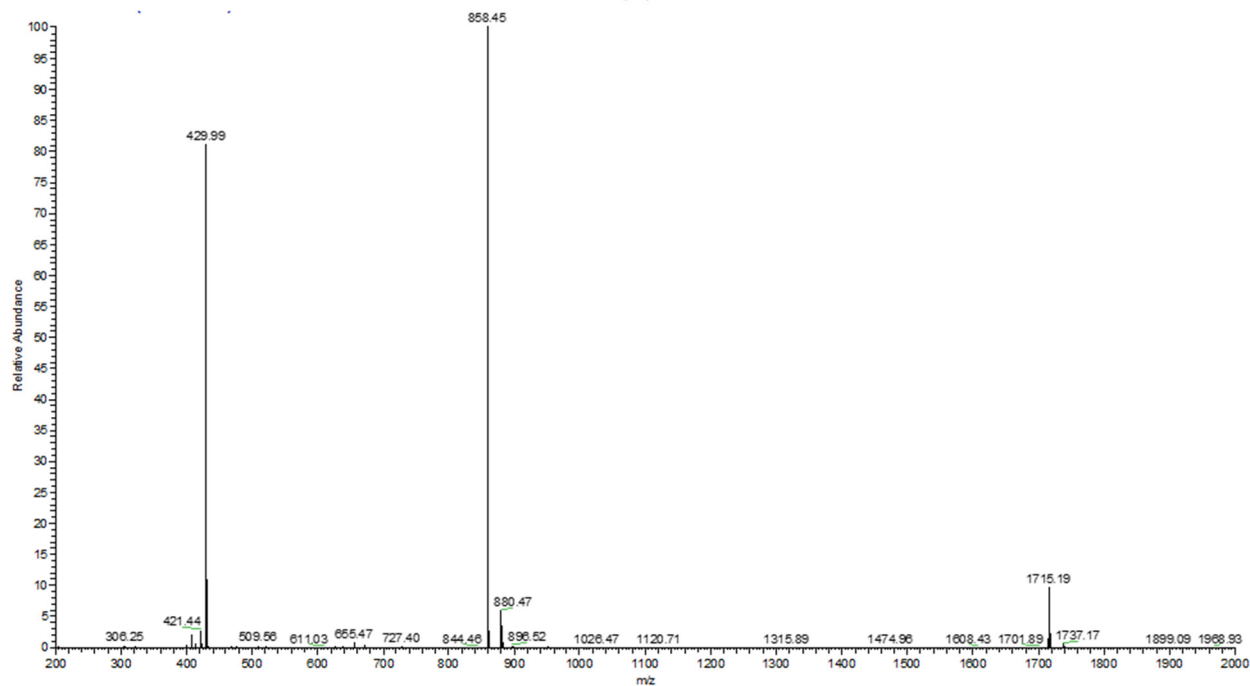



WYKY $\beta$ W

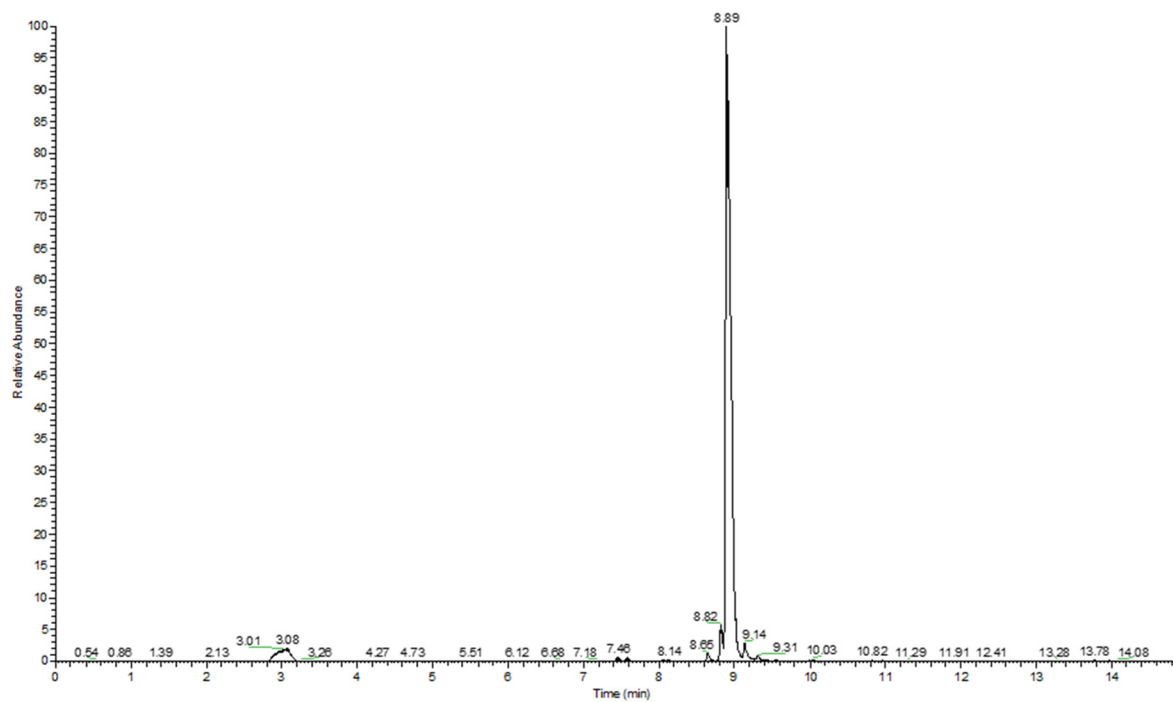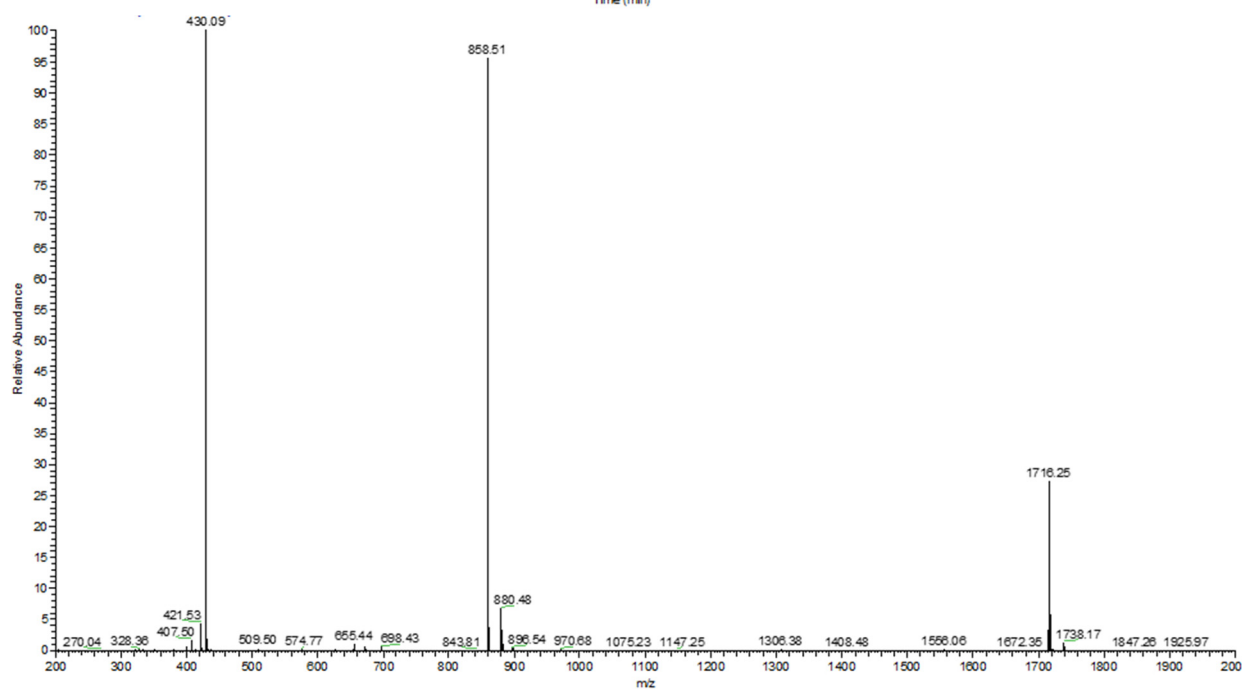

WYKYW $\beta$

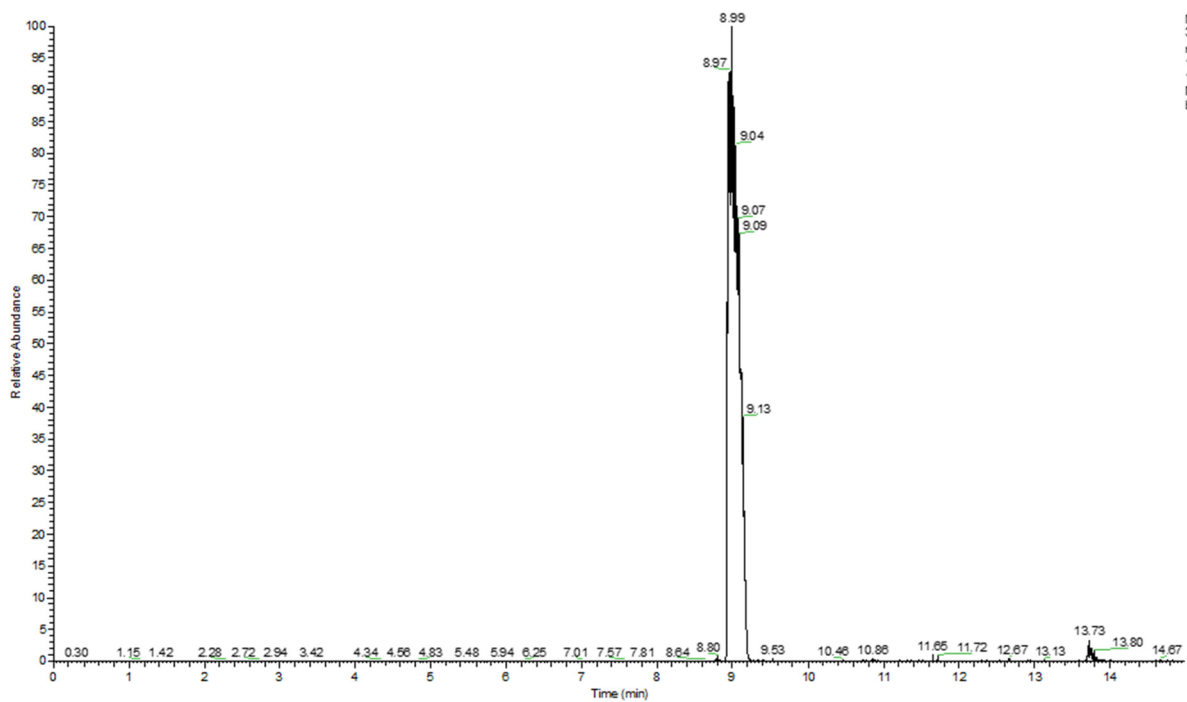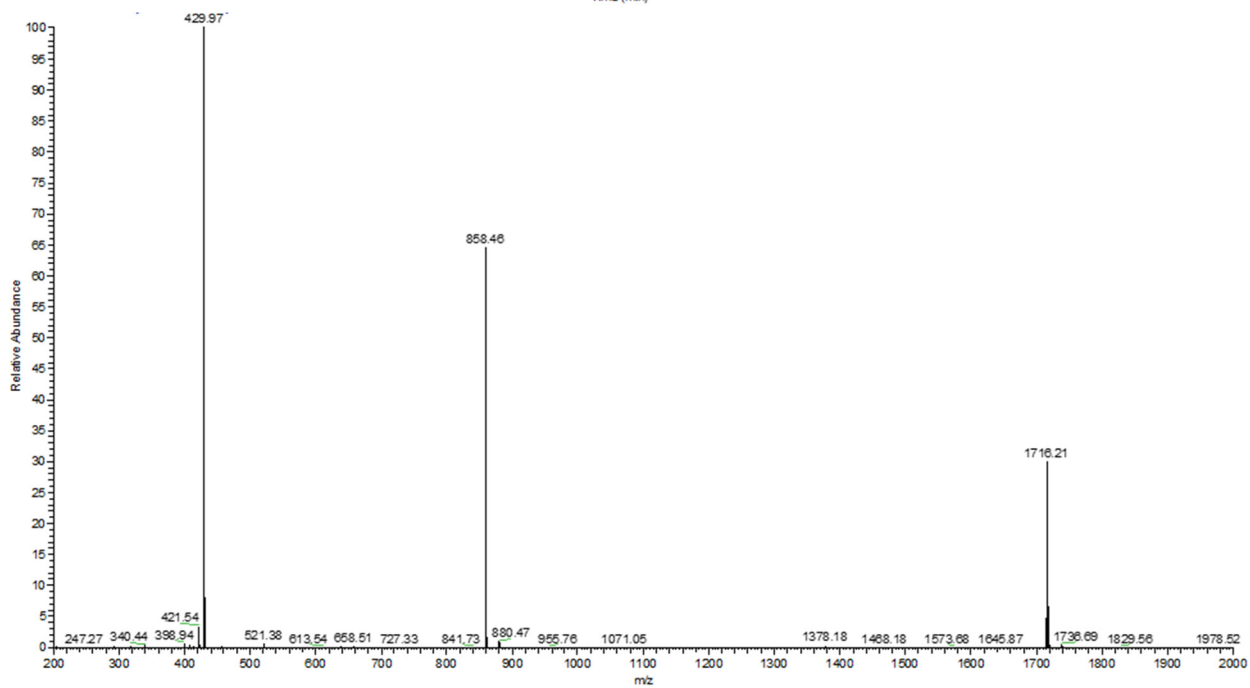

# AYKYW

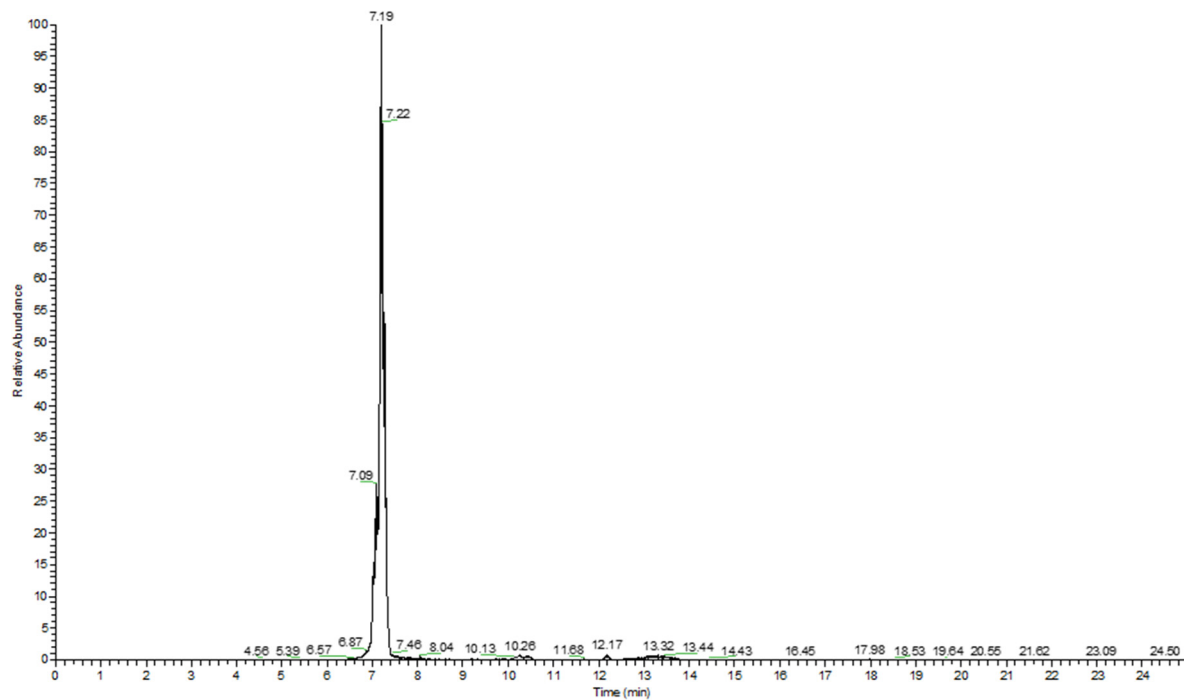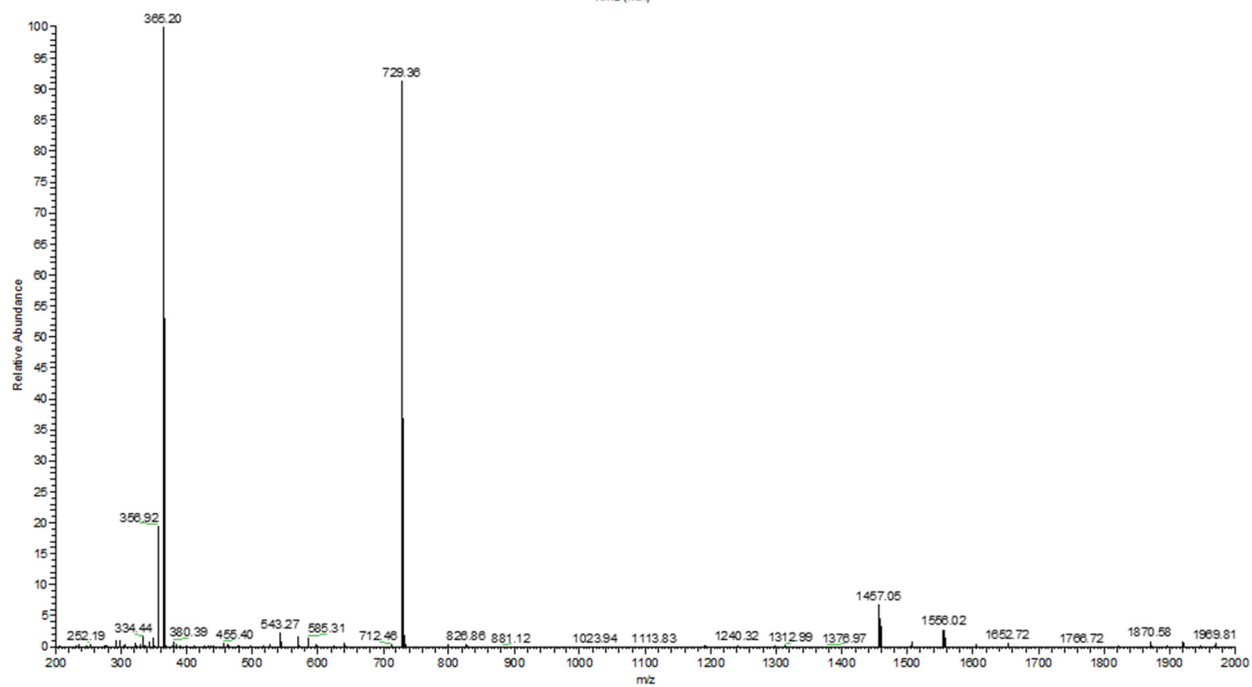

# WAKYW

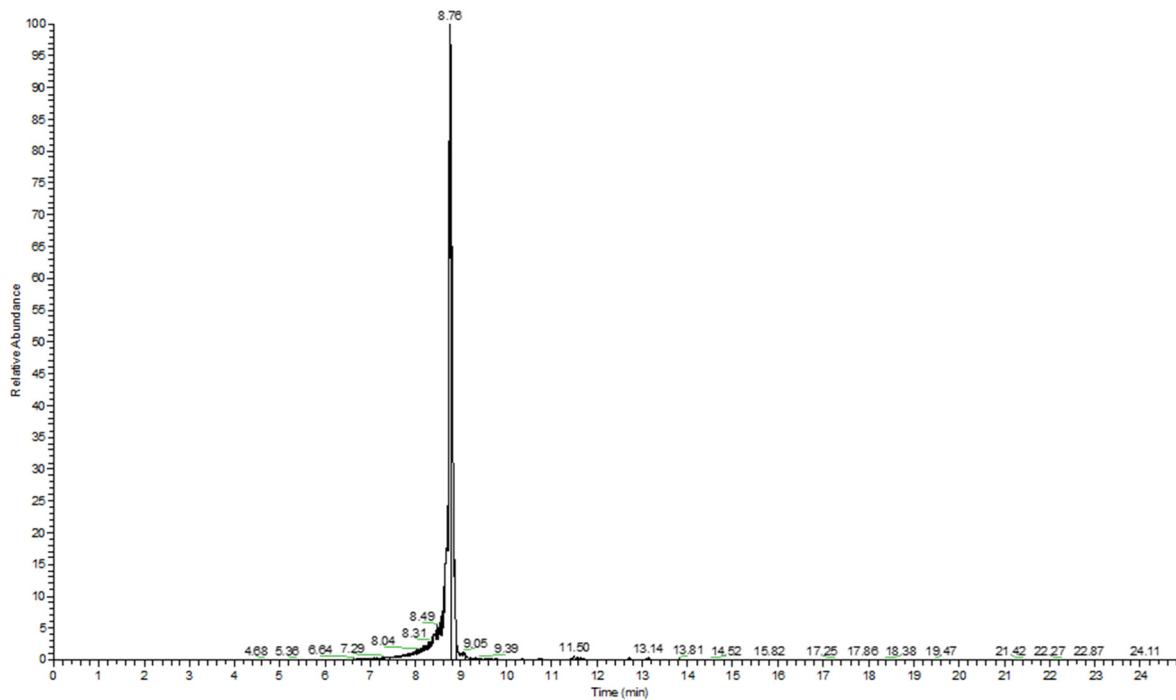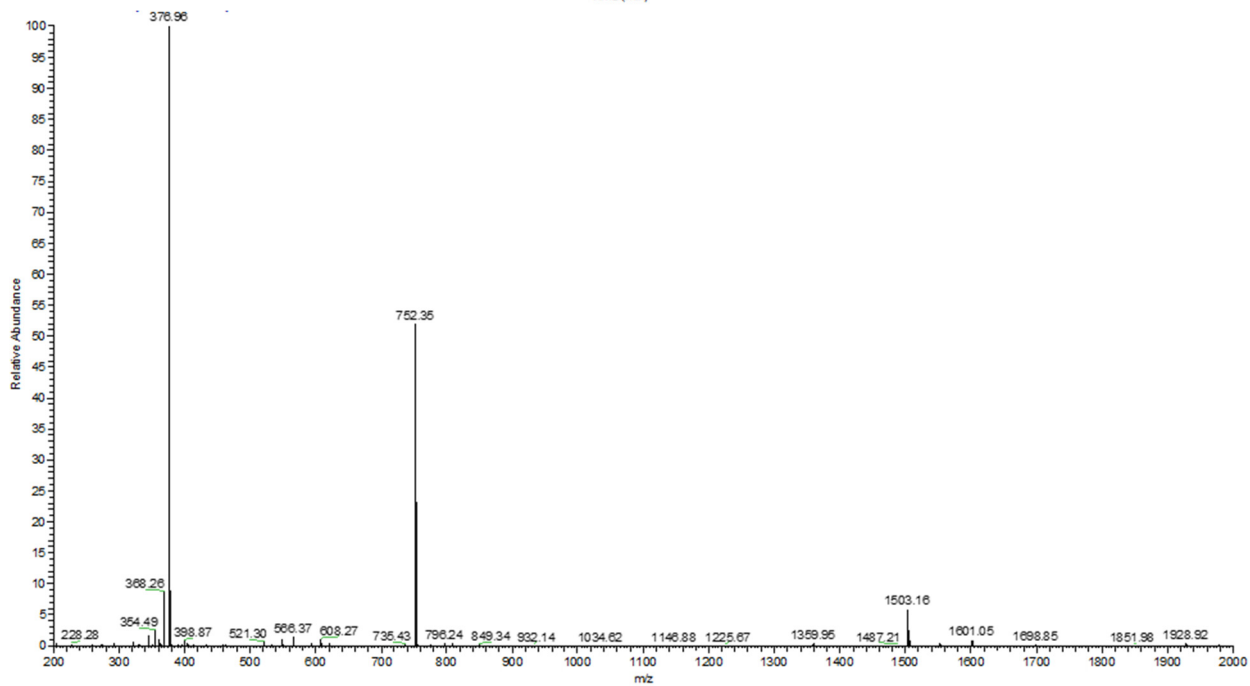

WYAYW

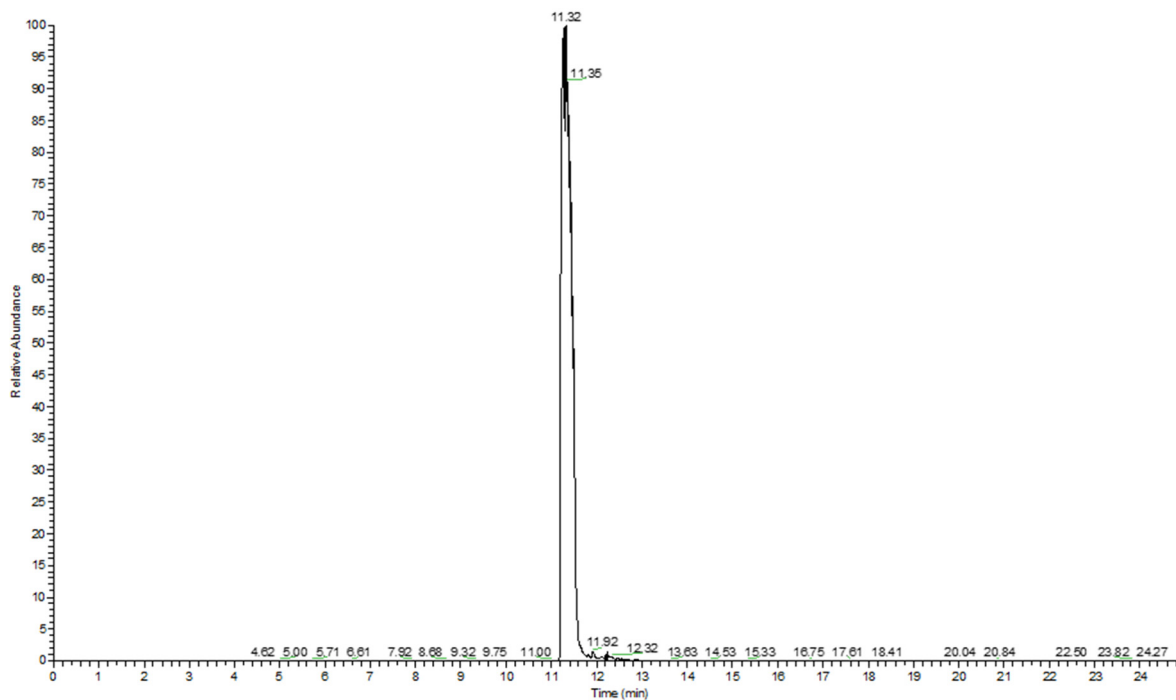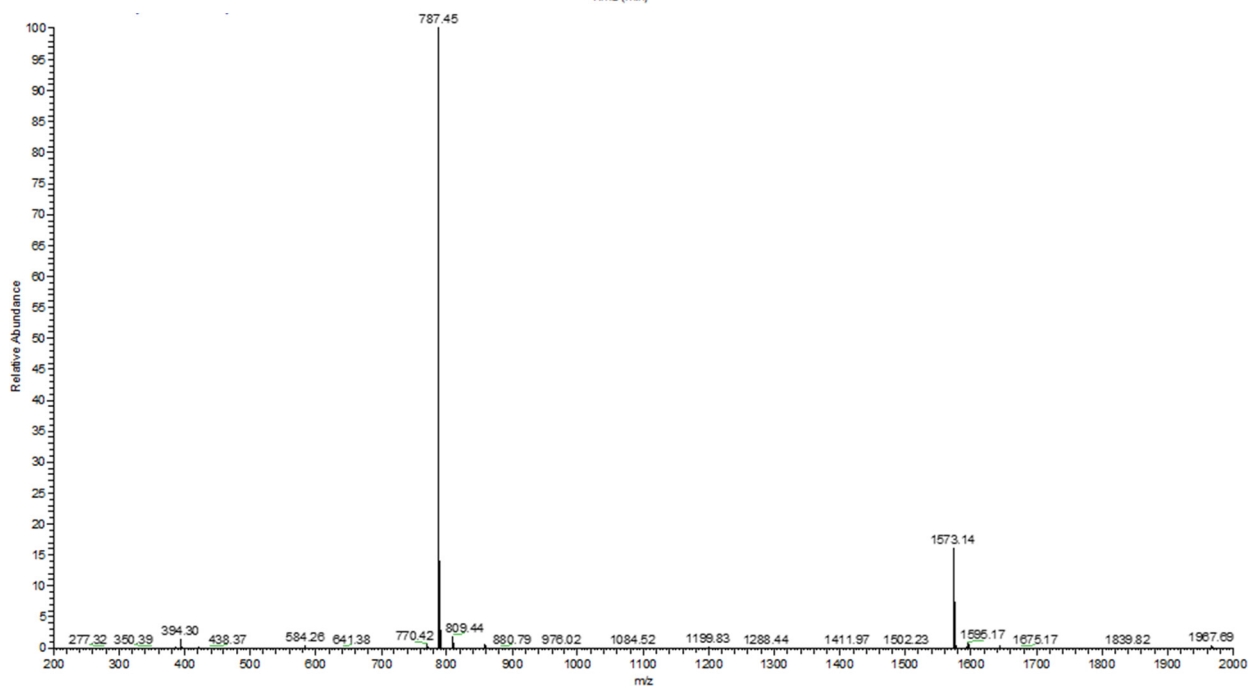

# WYKAW

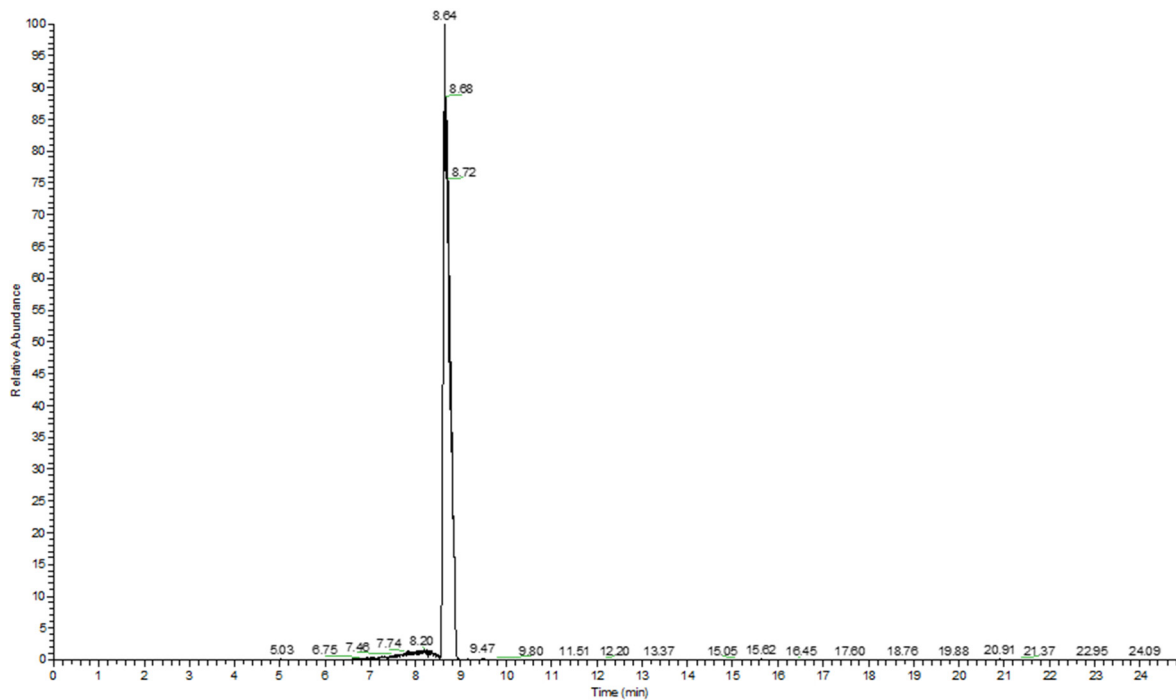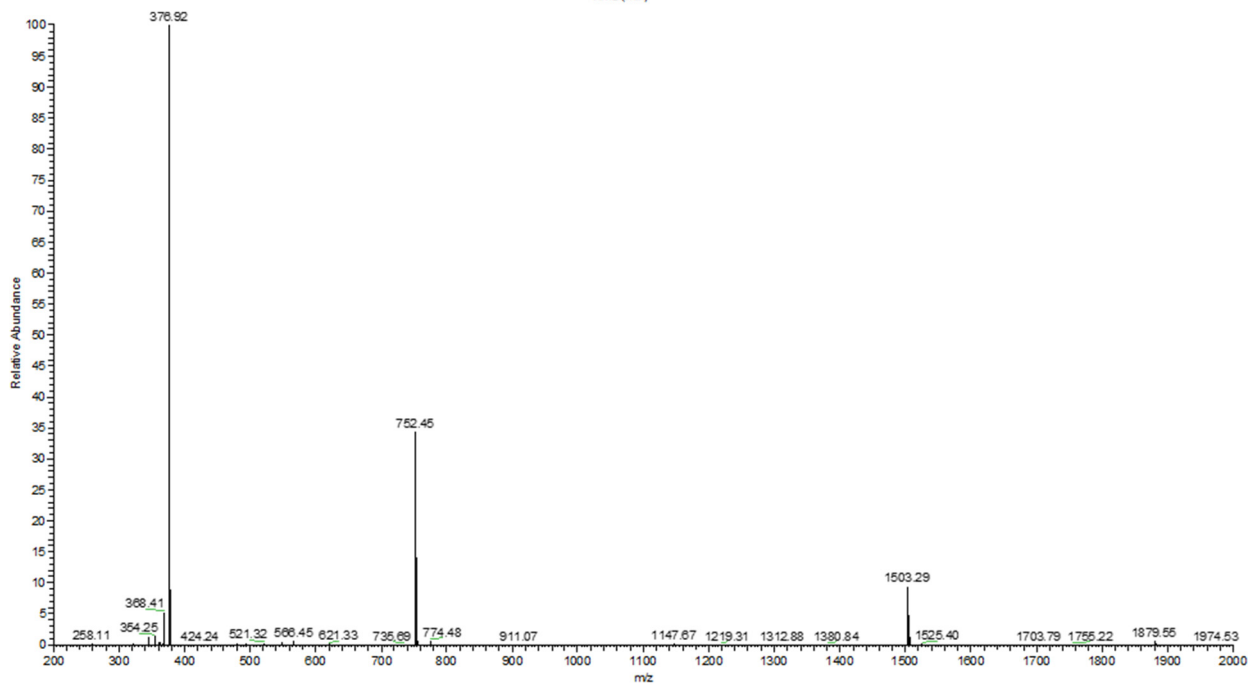

# WYKYA

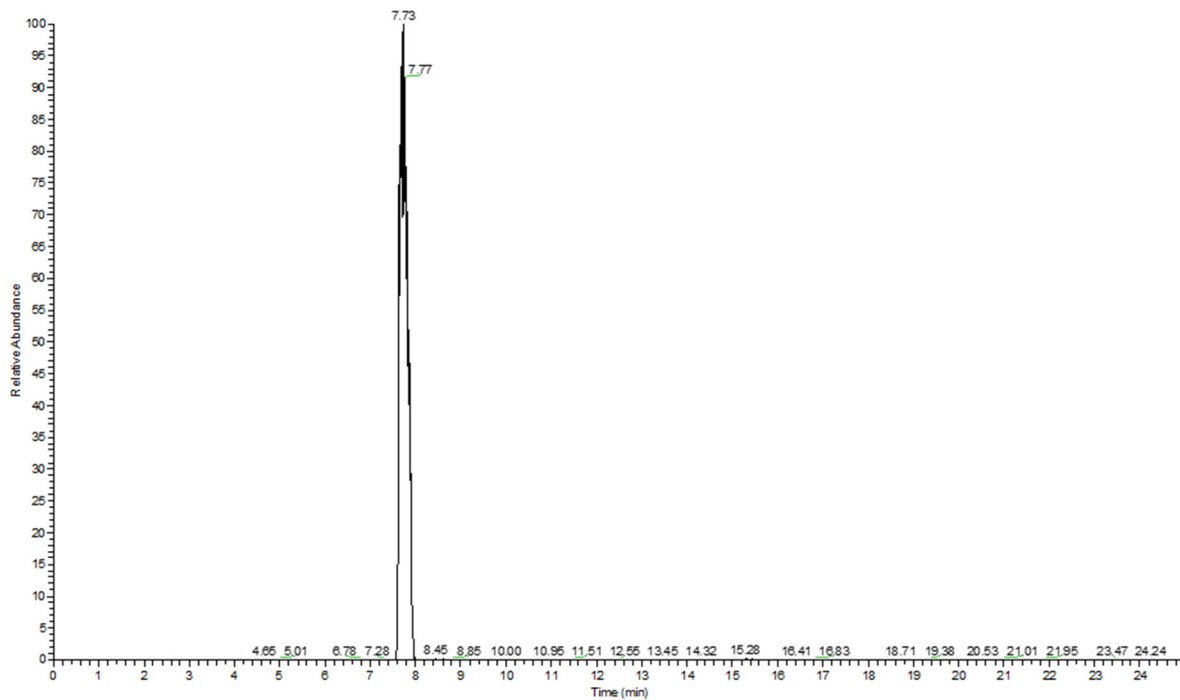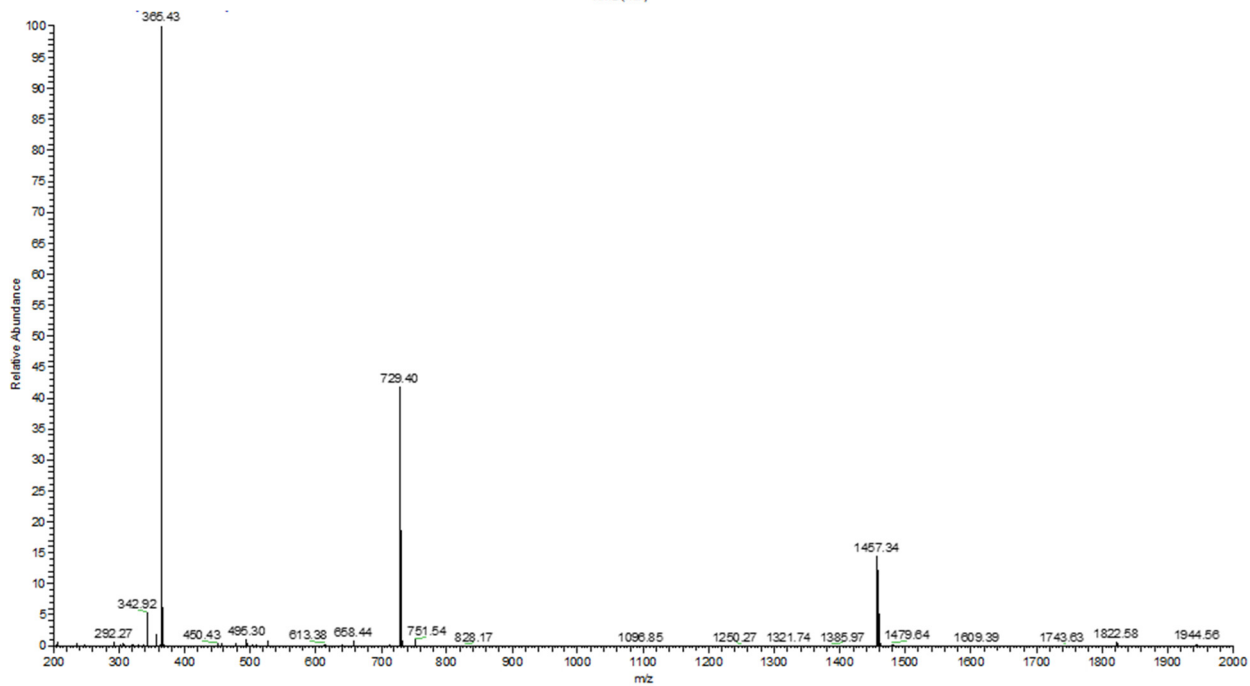

wYKYW

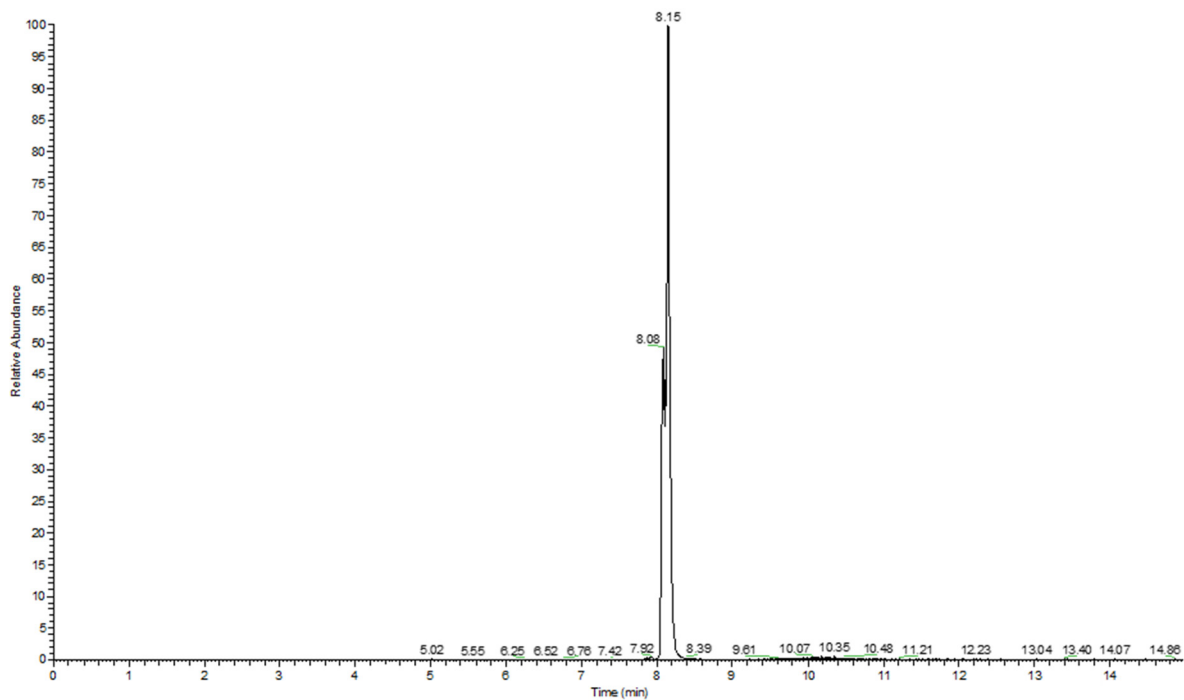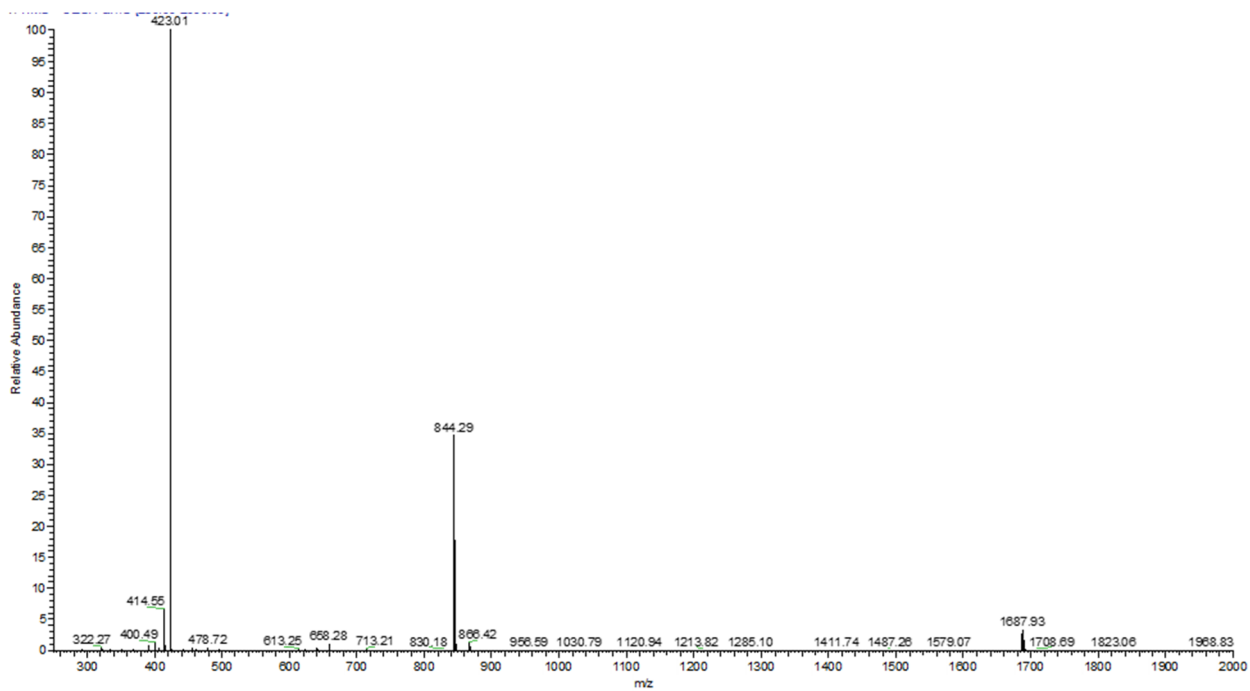



WyKYW

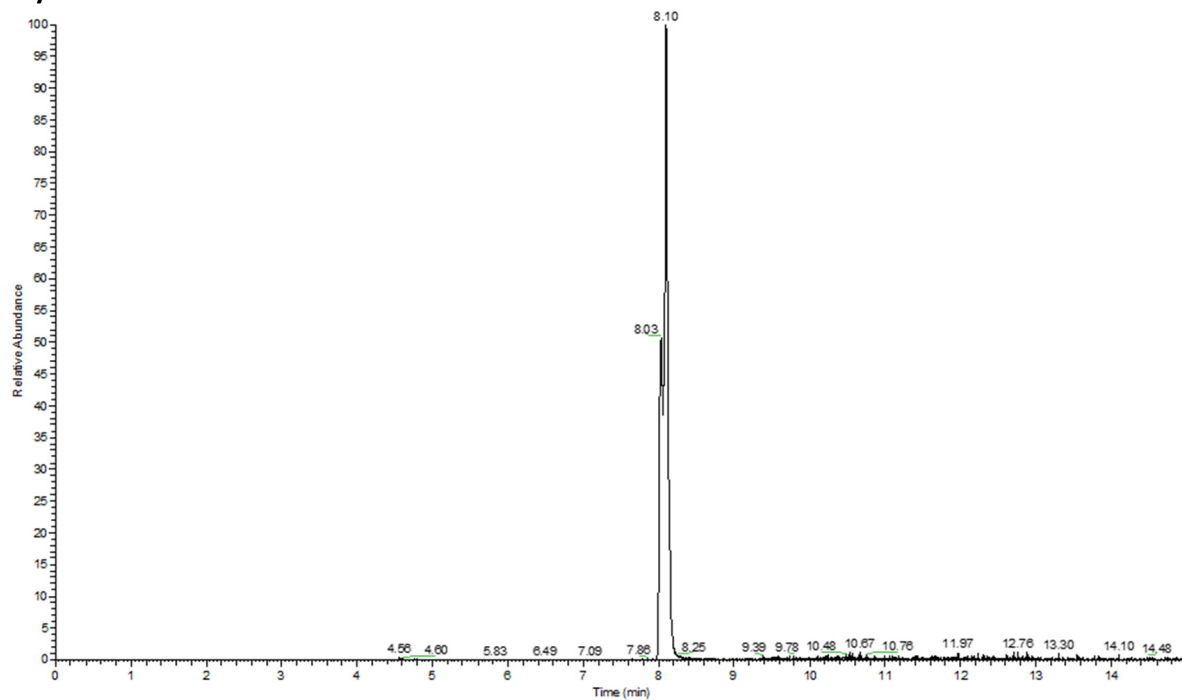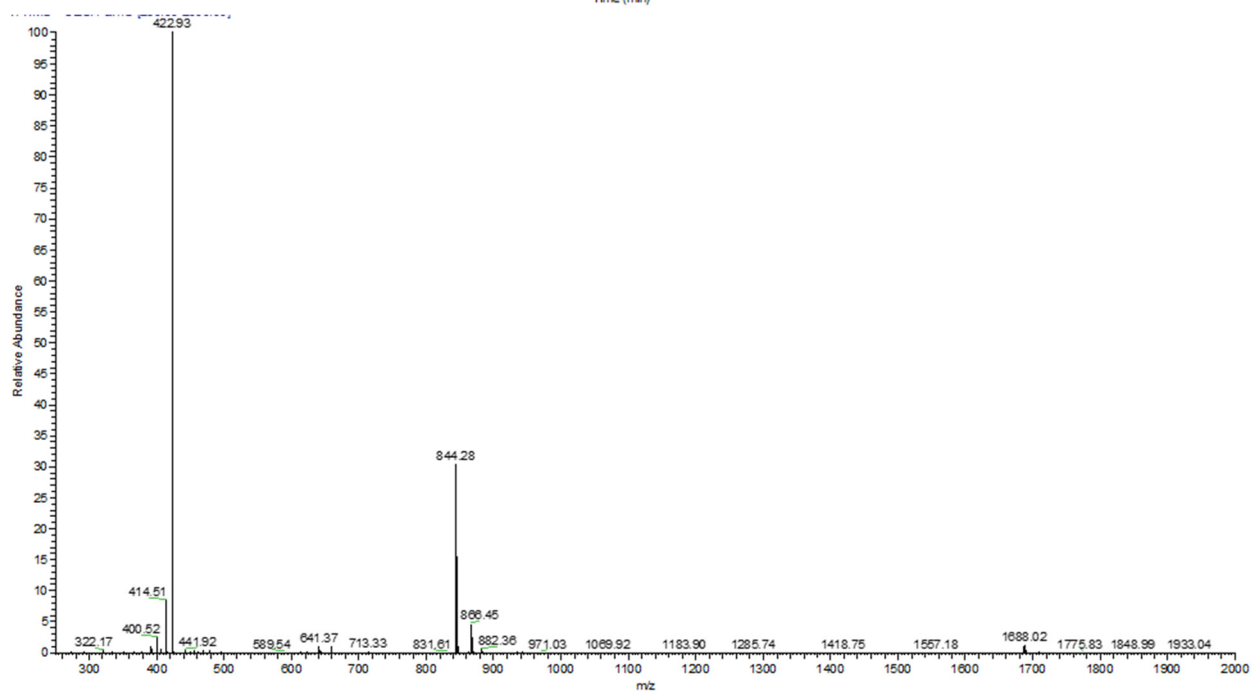

WYKYW

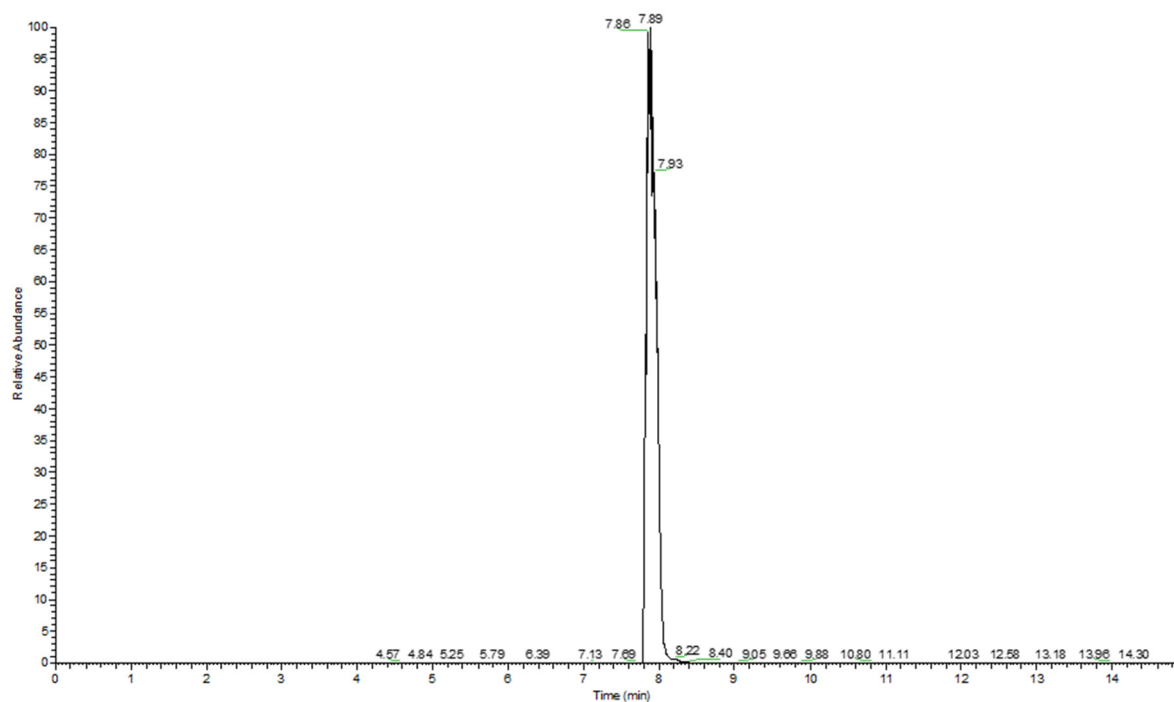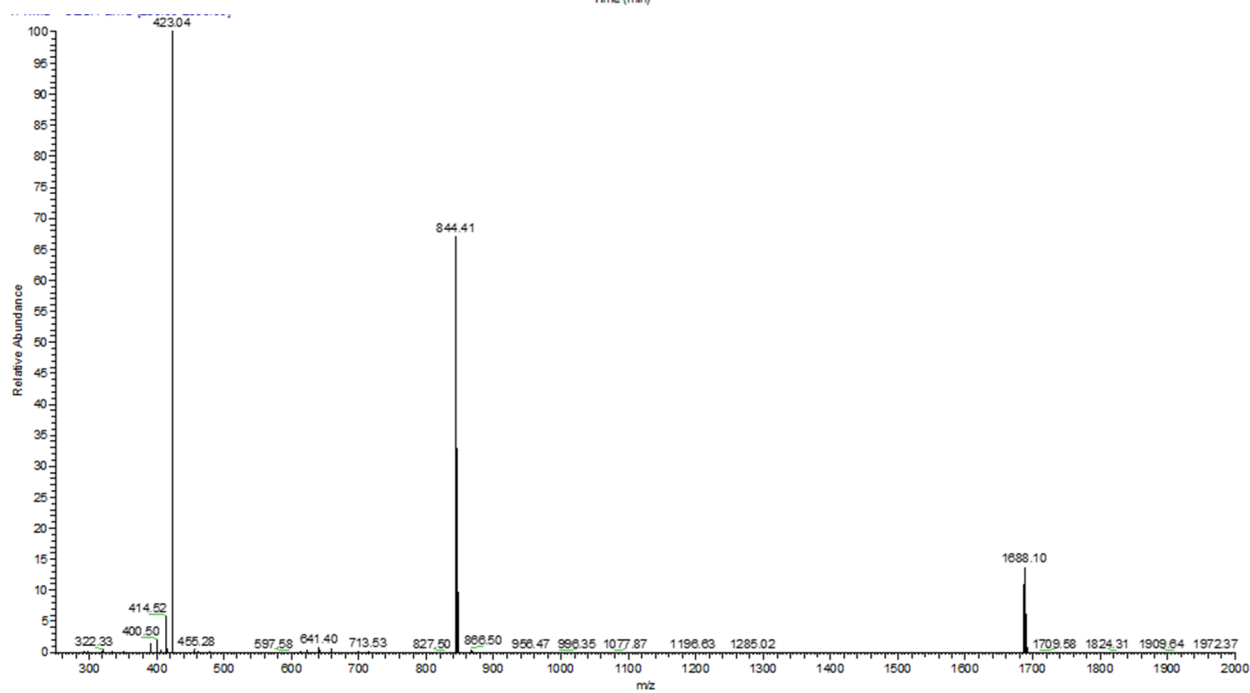

WYKyW

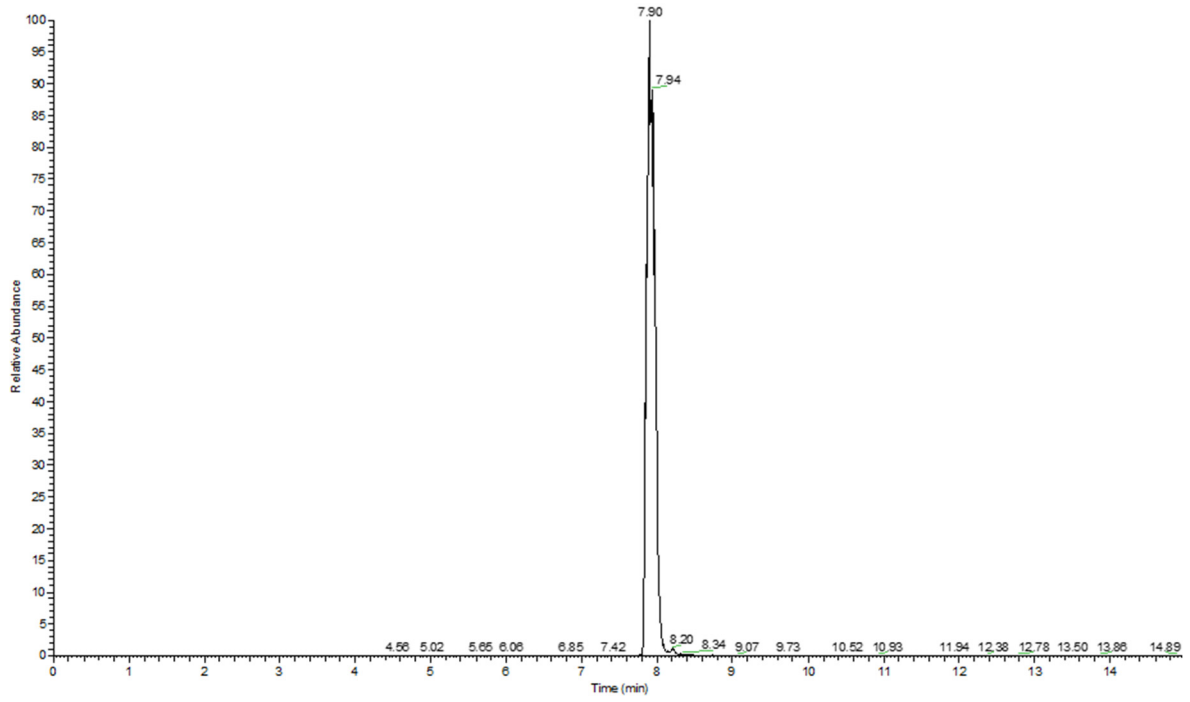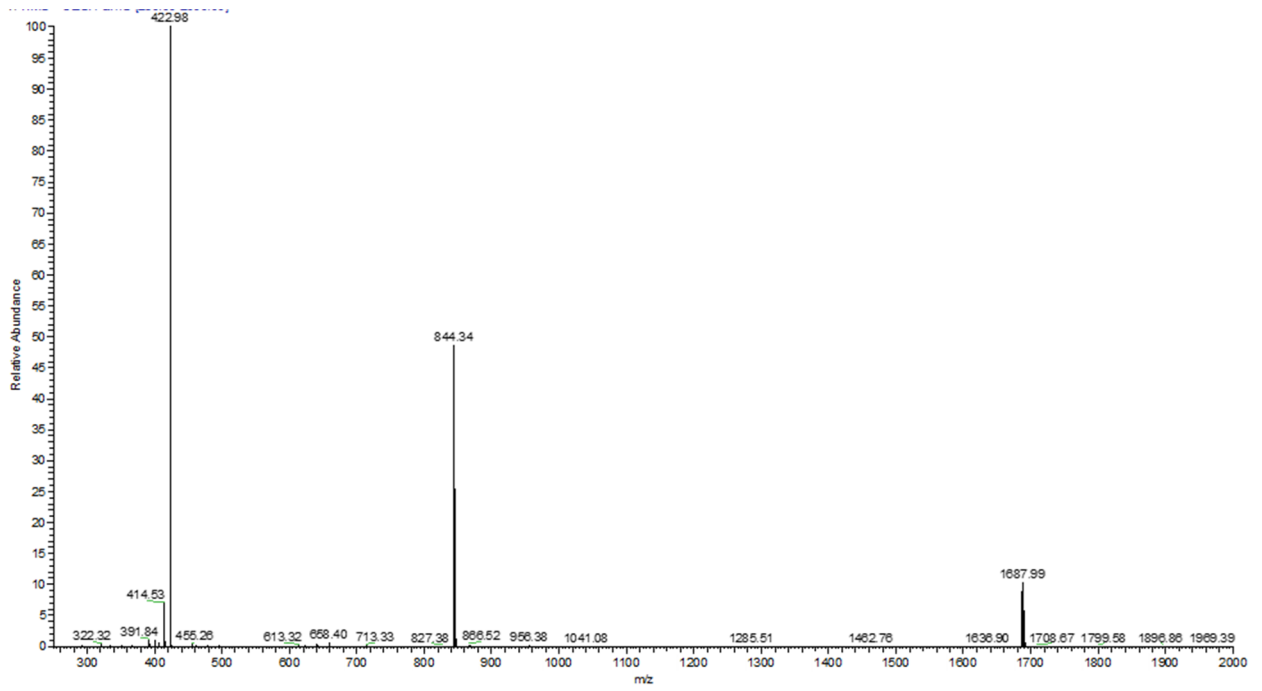

WYKYw

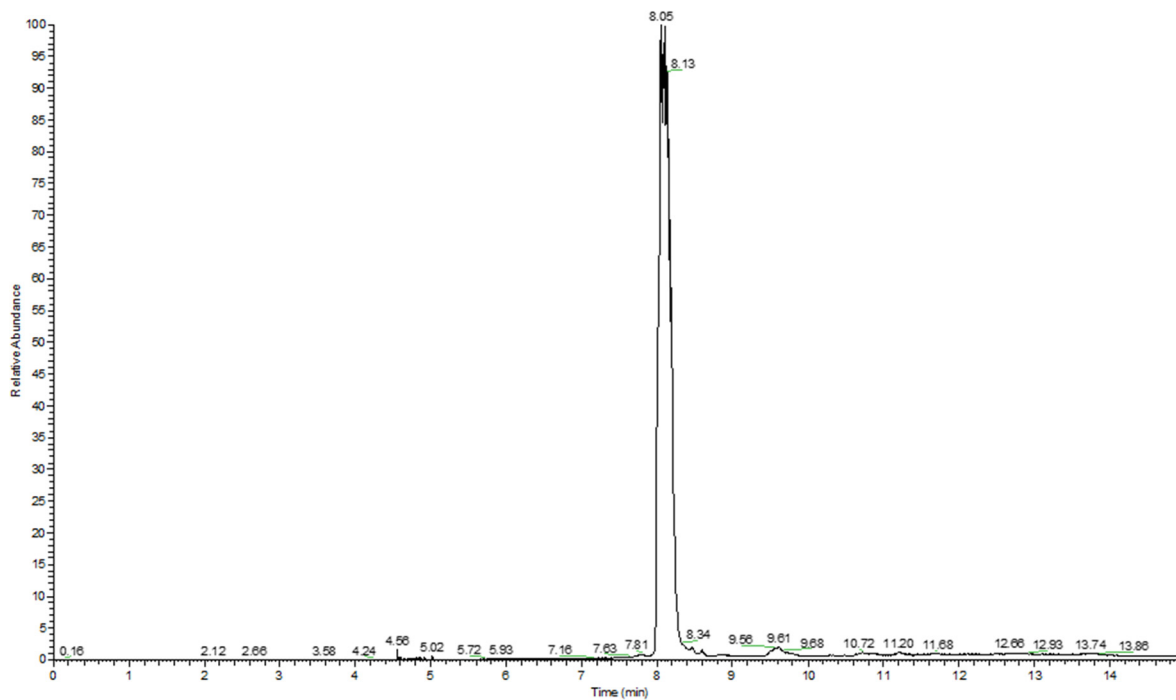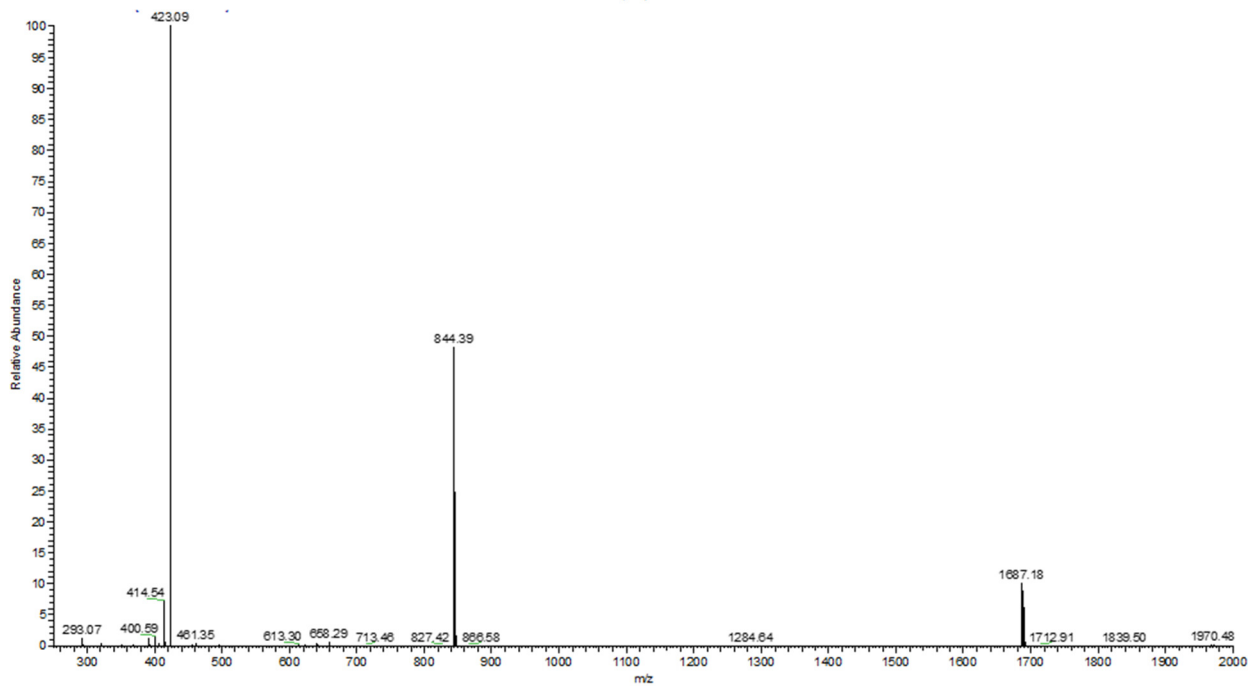

# WAKAW

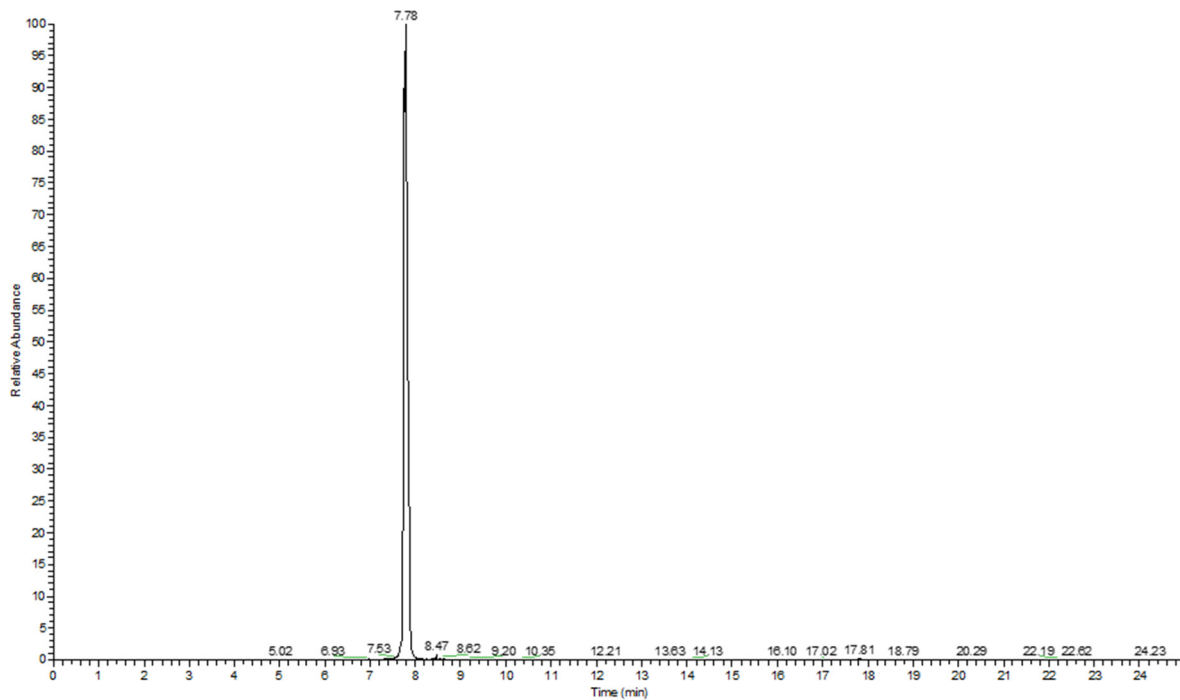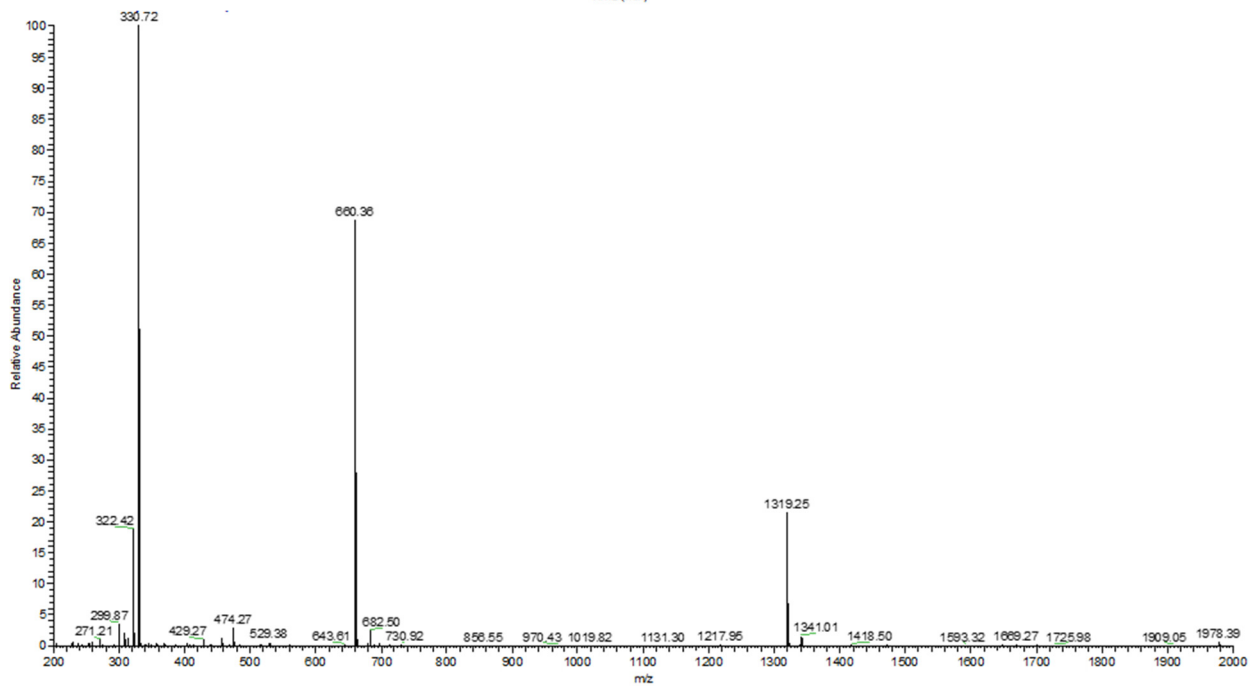

# AYKYA

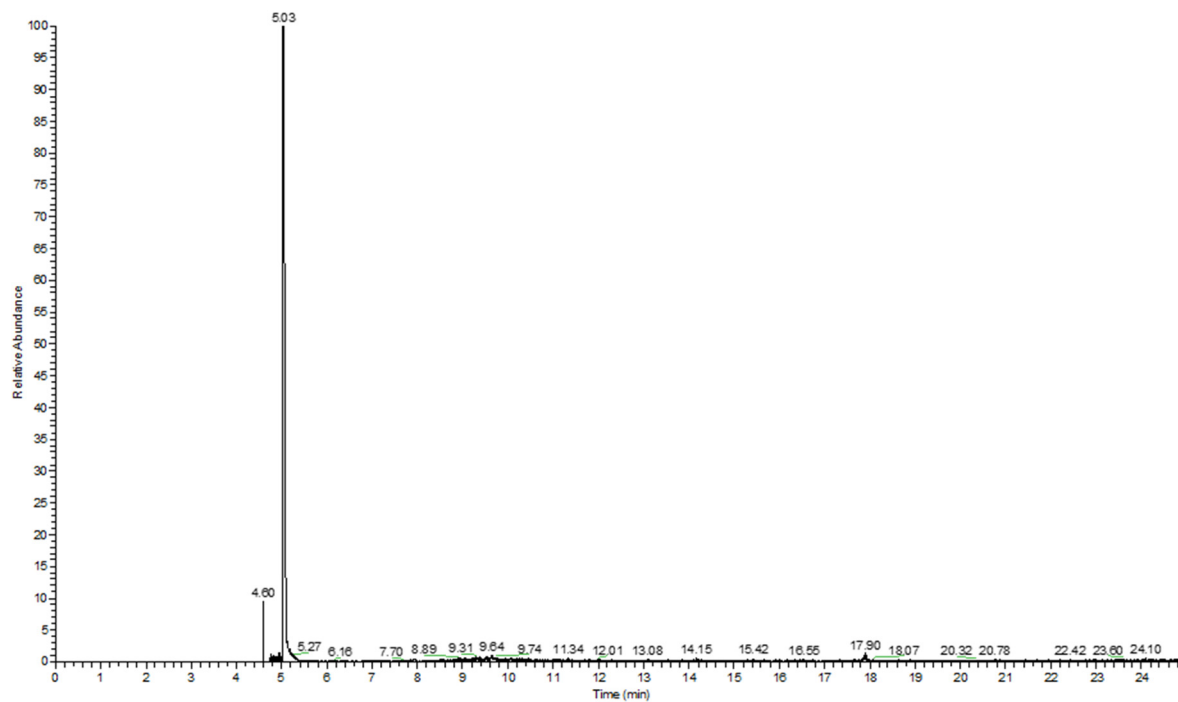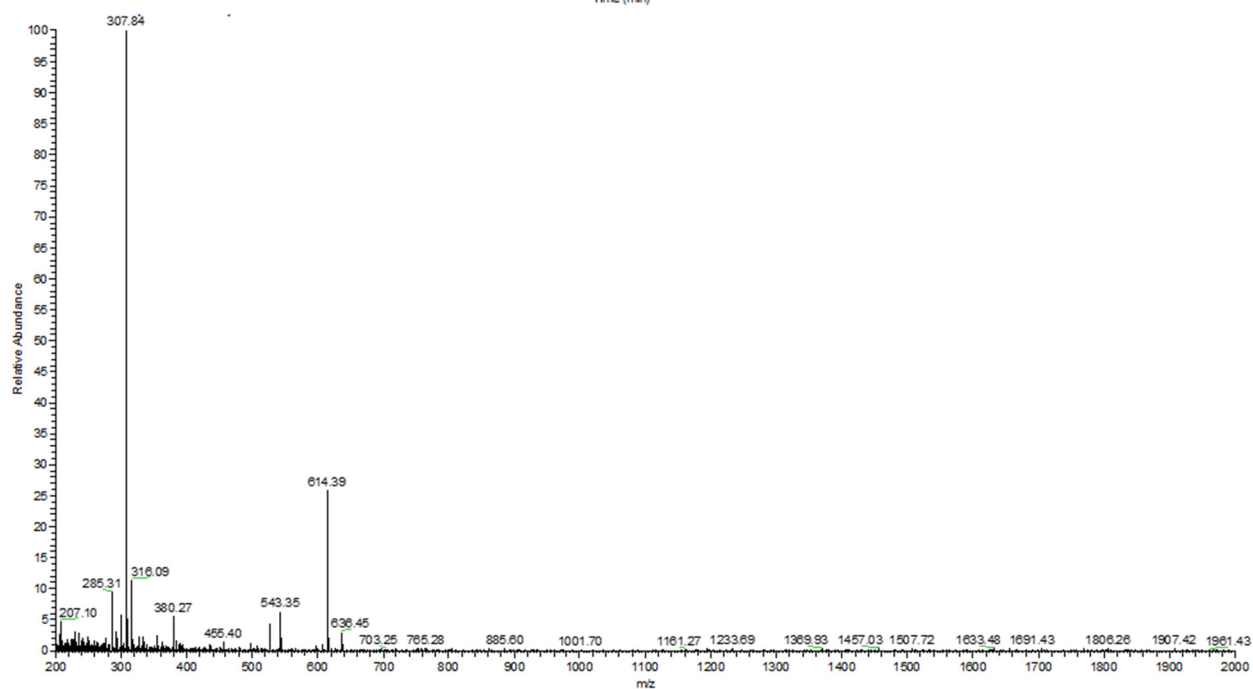

**Biotin-Penetratin-GG-W<sup>β</sup>YKYW (K(Biotin)-RQIKIWFQNRRMKWKKGGW<sup>β</sup>YKYW-NH<sub>2</sub>)**

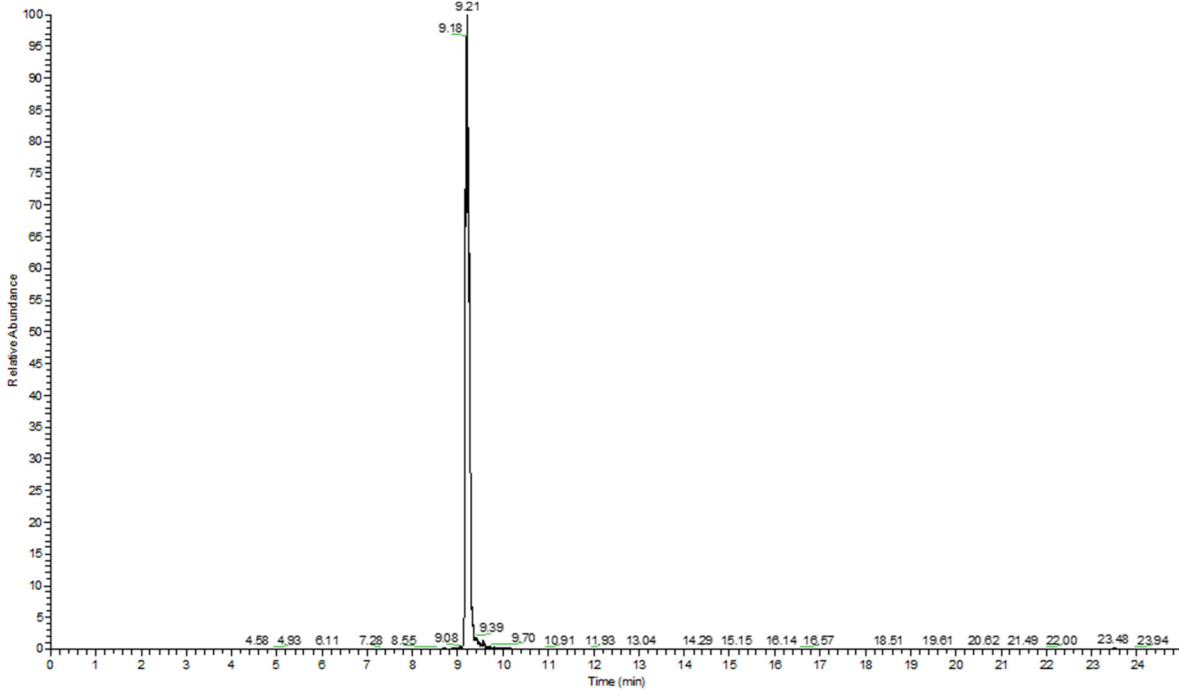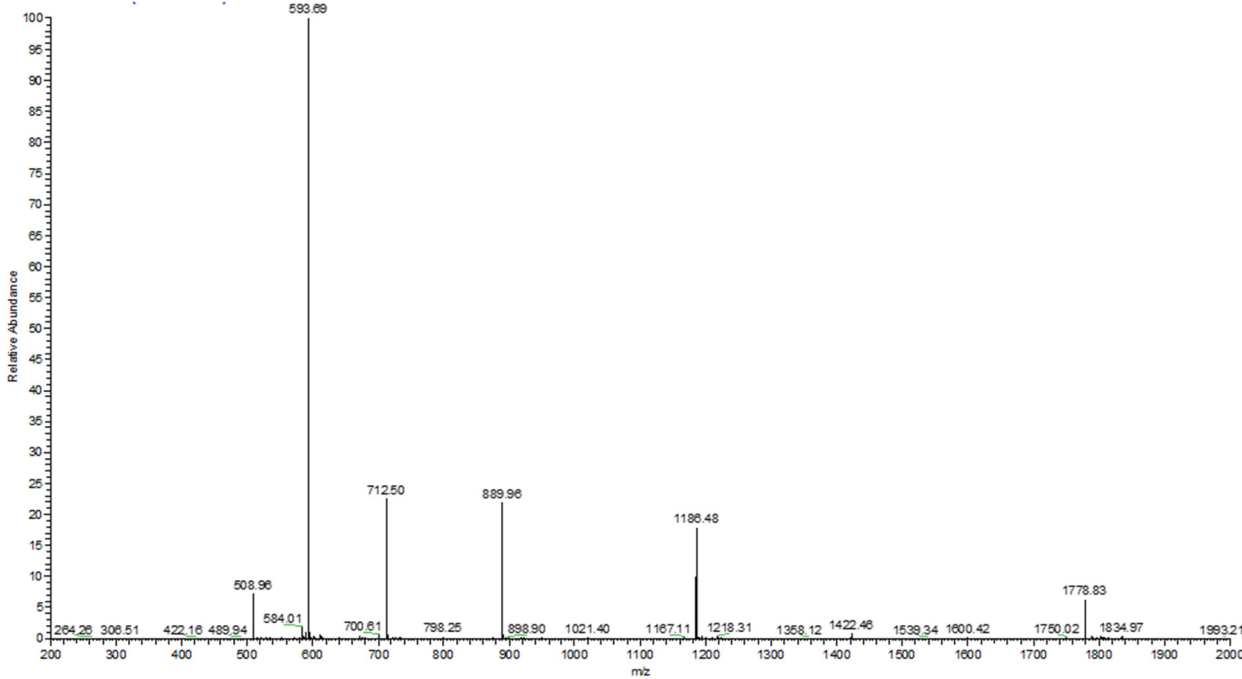

Biotin-Penetratin-GG-WY<sup>β</sup>KYW (K(Biotin)-RQIKIWFQNRRMKWKKGGWY<sup>β</sup>KYW-NH<sub>2</sub>)

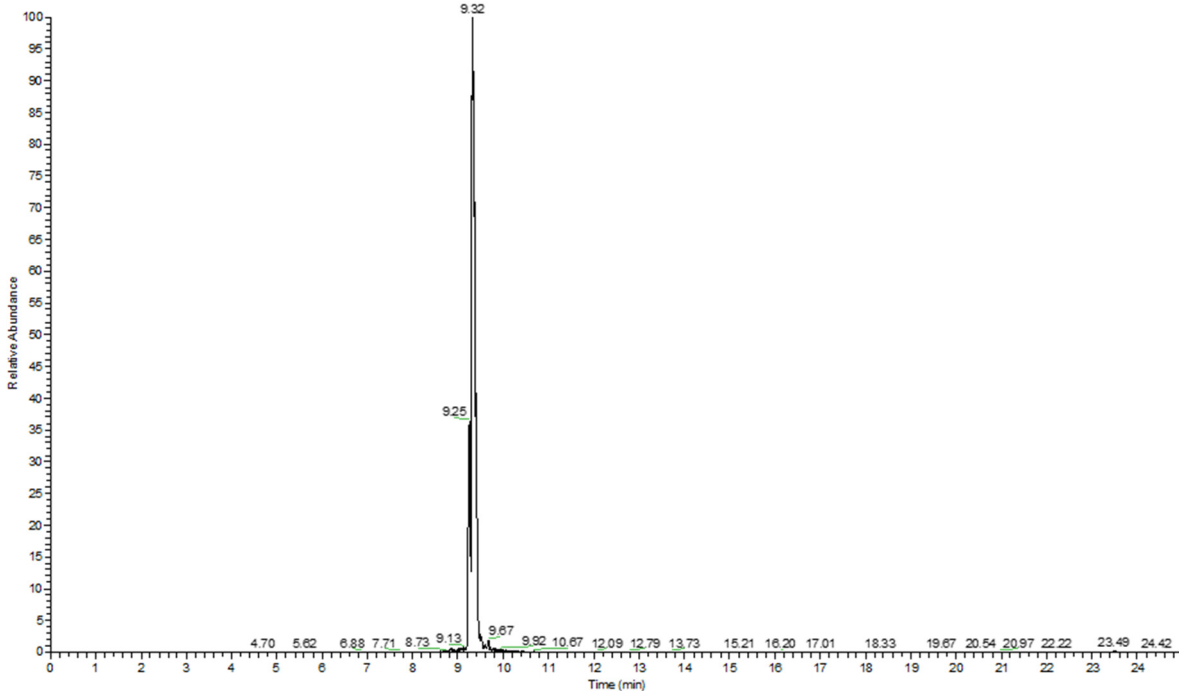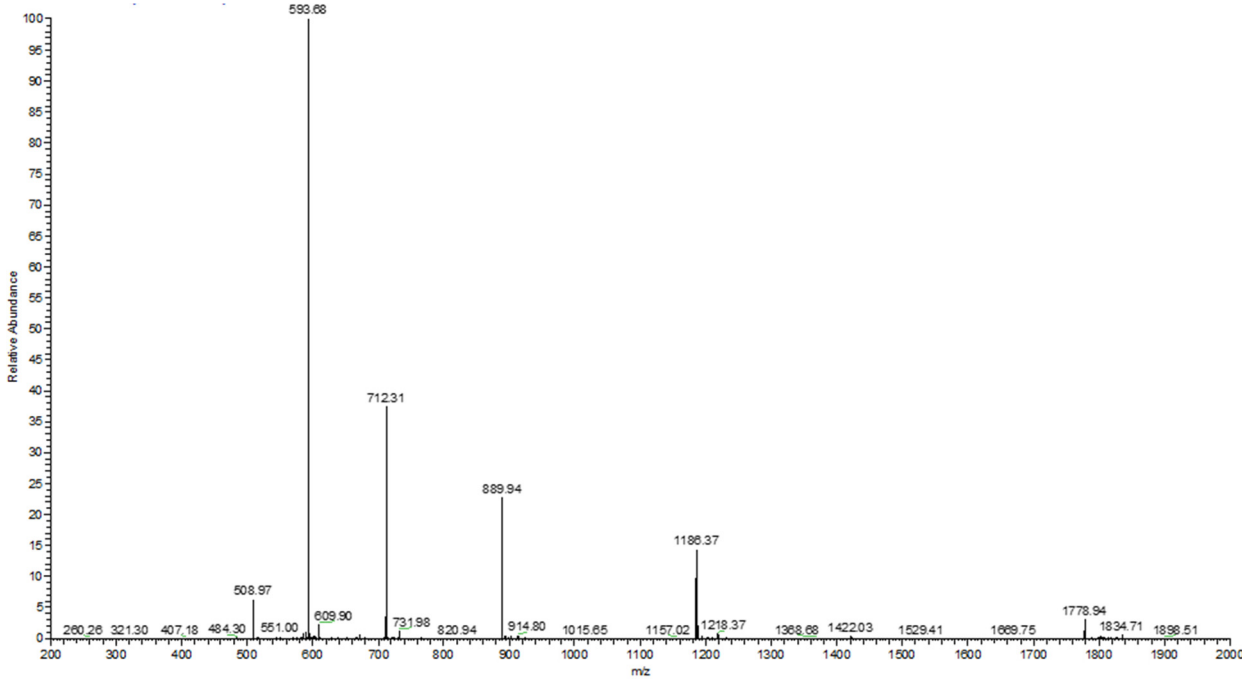



Biotin-Penetratin-GG-WYK<sup>β</sup>YW (K(Biotin)-RQIKIWFQNRRMKWKKGGWYK<sup>β</sup>YW-NH<sub>2</sub>)

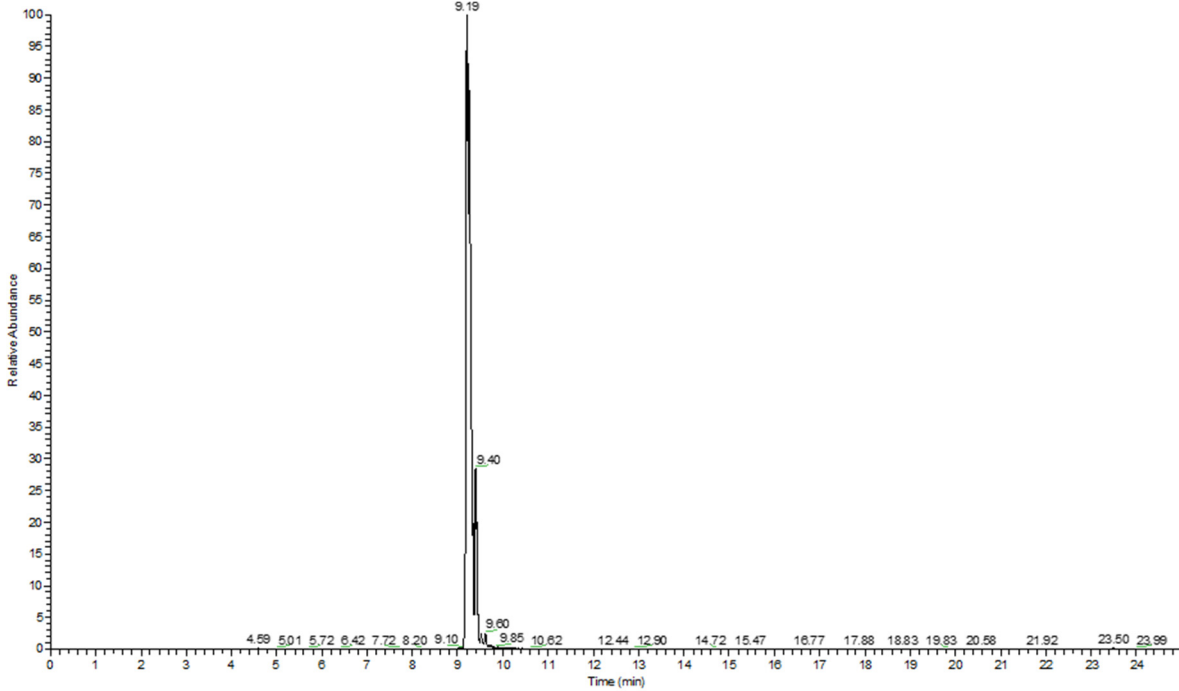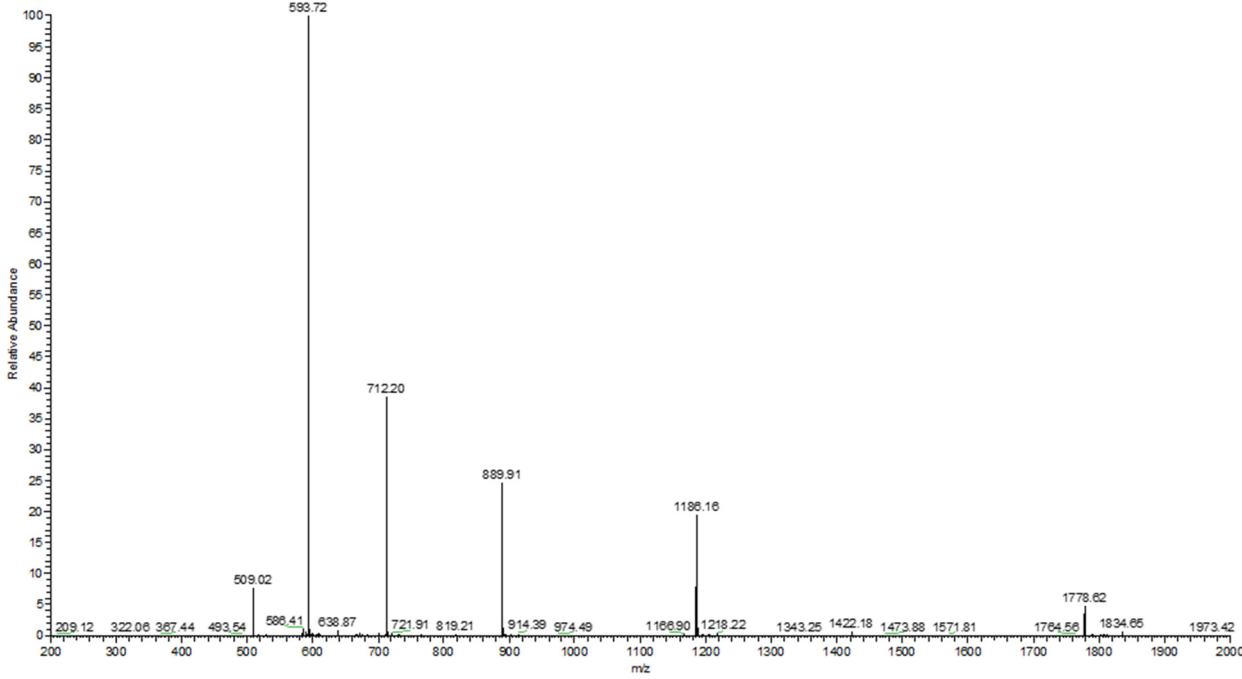

**Biotin-Penetratin-GG-WYKY<sup>β</sup>W (K(Biotin)-RQIKIWFQNRRMKWKKGGWYKY<sup>β</sup>W-NH<sub>2</sub>)**

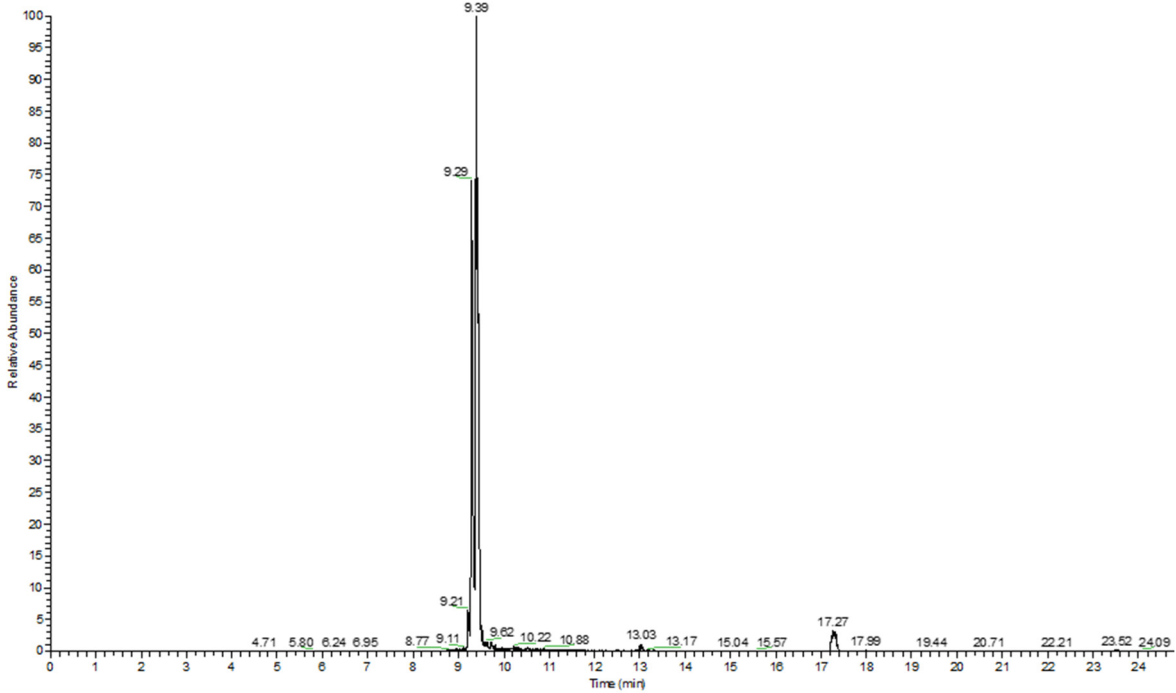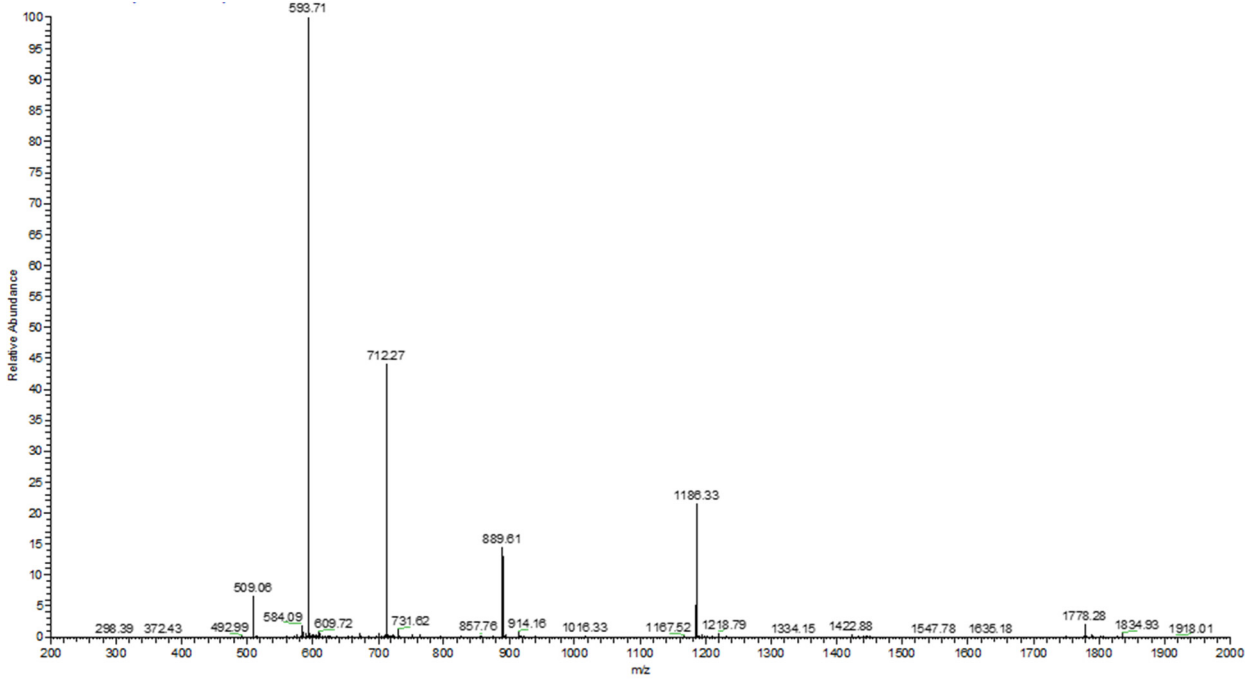

**Biotin-Penetratin-GG-WYKYW<sup>β</sup> (K(Biotin)-RQIKIWFQNRRMKWKKGGWYKYW<sup>β</sup>-NH<sub>2</sub>)**

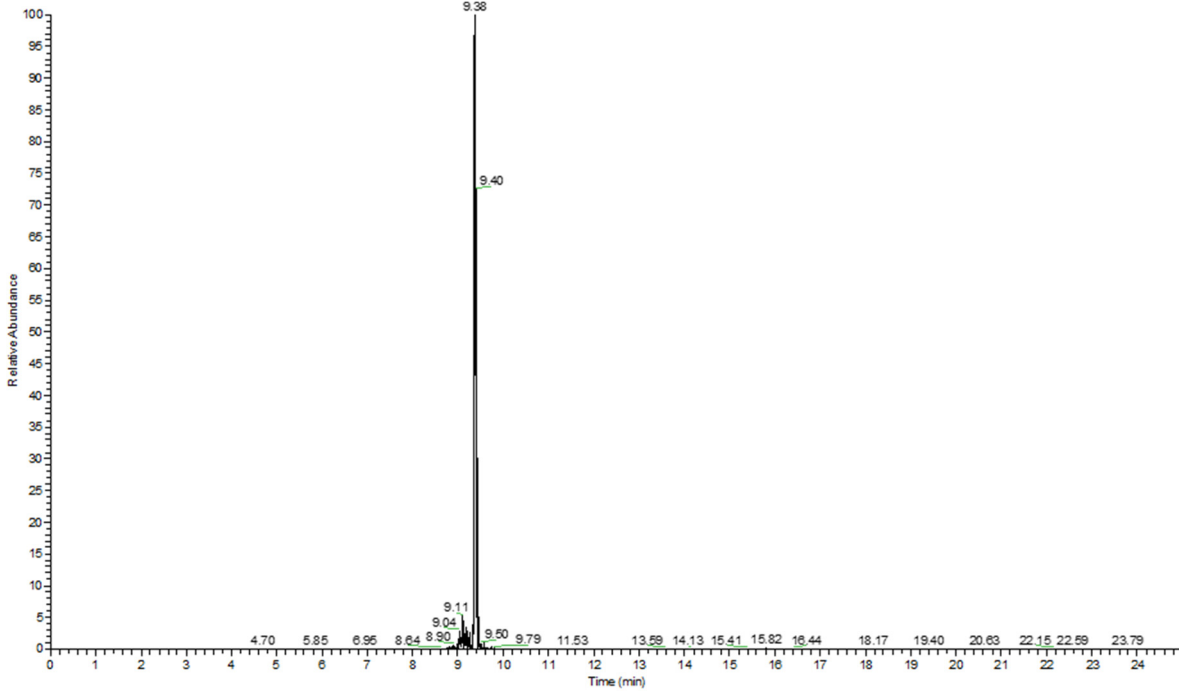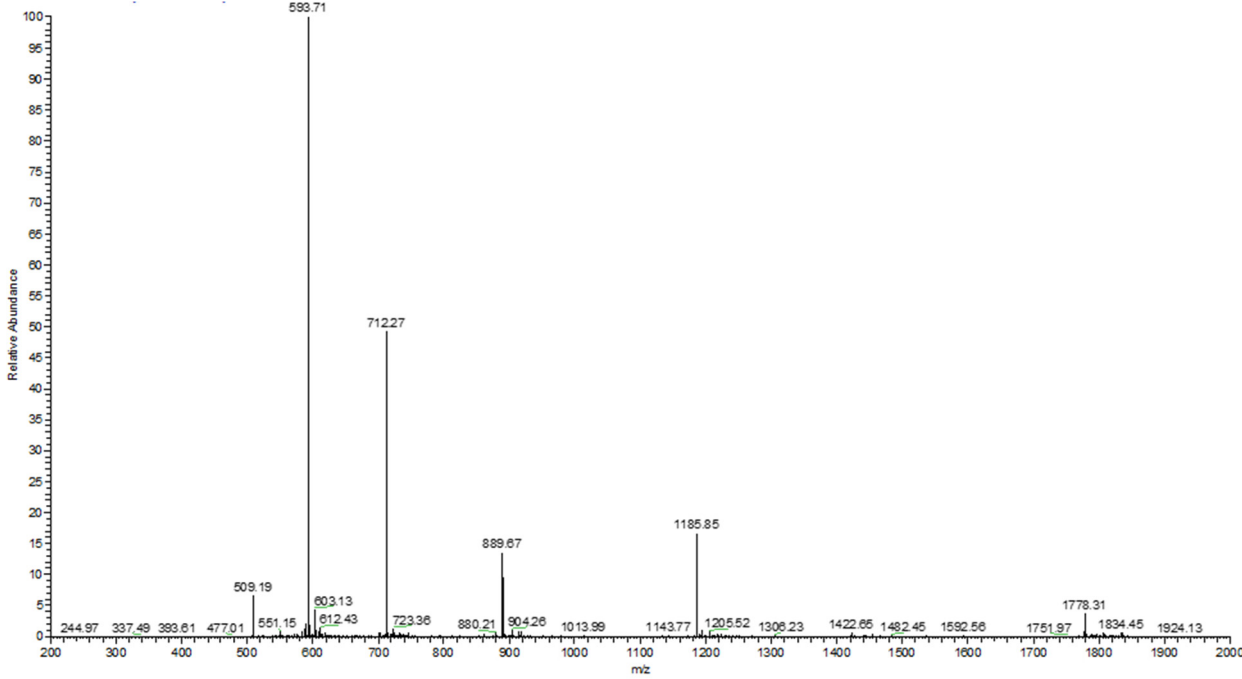

# Biotin-Penetratin-GG-WYKYW (K(Biotin)-RQIKIWFQNRRMKWKKGGWYKYW-NH<sub>2</sub>)

RT: 0.00 - 25.00

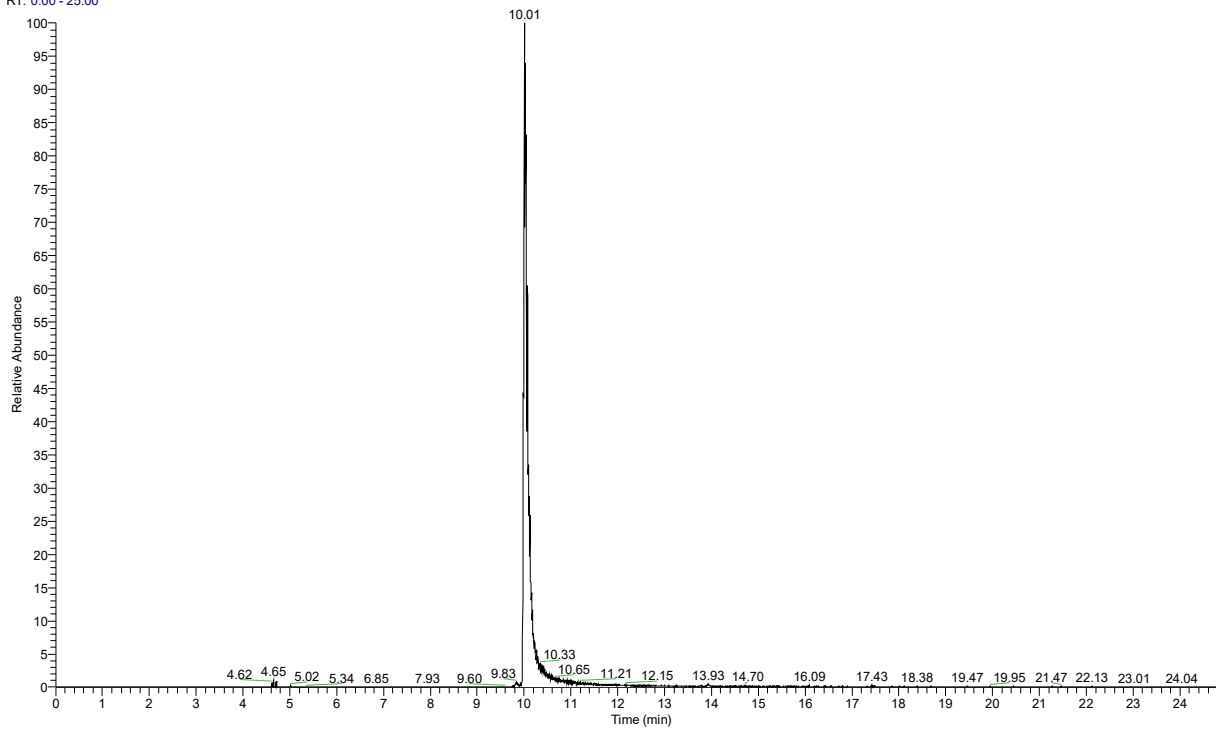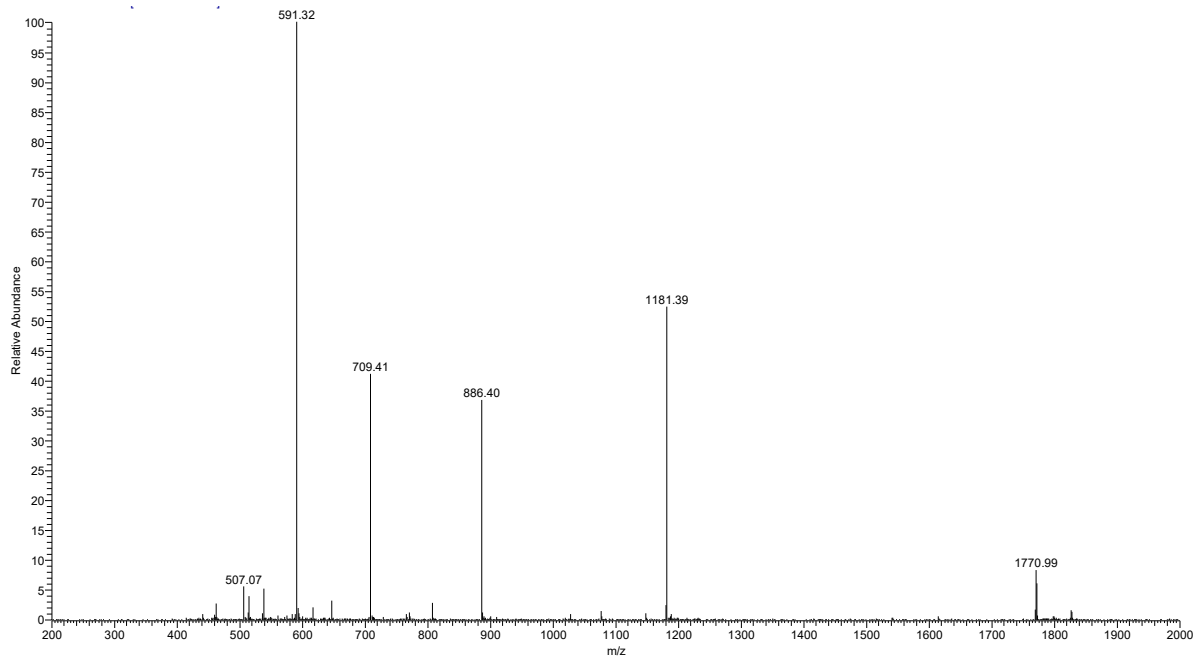

Supplement: s1 [file s1]
